# Supplementary material for: Non-symmetric dimers comprising chalcone and cholesterol entities: an investigation on structure–property correlations
Source: Royal Society of Chemistry journal article supplement (doi:10.1039/c4nj00426d), 2014-01-01
Supplement: c4nj00426d1.pdf [file c4nj00426d1.pdf]

**Nonsymmetric dimers comprising chalcone and cholesterol entities:  
An investigation on structure-property correlations**

**Ammathnadu S. Achalkumar,<sup>\*a</sup> Doddamane S. Shankar Rao<sup>b</sup>, and  
Channabasaveshwar V. Yelamaggad<sup>\*b</sup>**

<sup>a</sup> *Indian Institute of Technology Guwahati, Guwahati, 781039, Assam, India*

<sup>b</sup> *Centre for Soft Matter Research, Jalahalli, P. B. No. 1329, Bangalore, 560013,  
India.*

Supporting Information

## **I. Experimental Section**

### **I.1. Materials and methods**

Chemicals were obtained from Fluka, Aldrich, Lancaster and local chemical companies, and were used without any purification; solvents were dried following the standard procedures. Chromatography was performed using silica gel (60-120 and 100-200 mesh). Aluminium sheets pre-coated with silica gel (Merck, Kieselgel60, F<sub>254</sub>) were used for thin layer chromatography, IR spectra were recorded on a Perkin-Elmer Spectrum 1000 FT-IR spectrometer. The spectral positions are given in wave number (cm<sup>-1</sup>) unit. NMR spectra were recorded using either a Bruker DRX -500 (500 MHz) or Bruker AMX-400 (400 MHz) spectrometer or Bruker Avance series DPX-200(200 MHz) spectrometer. For <sup>1</sup>H NMR spectra, the chemical shifts are reported in ppm relative to TMS as an internal standard. Coupling constants are expressed in Hz. Microanalyses were performed using a Euro EA3000 model elemental analyzer. Mass spectra were determined on JEOL JMS-600H spectrometer in FAB<sup>+</sup> mode using 3-nitrobenzylalcohol as a liquid matrix.

X-Ray diffraction studies were carried on powder samples in Lindemann capillaries with CuK<sub>α</sub> radiation using an Image Plate Detector (MAC Science, Japan) equipped with a double mirror focusing optics. The mesogenic compounds were investigated for their liquid crystalline behavior by employing an optical polarizing microscope (Leica DMLP) equipped with a programmable hot stage (Mettler FP90) and differential scanning calorimeter (Perkin Elmer DSC7). Abovementioned optical polarizing microscope equipped with a programmable hot stage and differential scanning calorimeter were used to determine the melting points of non-mesomorphic compounds.

## I.2. Syntheses

### I.2.1. General procedure for the synthesis of 4-*n*-alkoxy benzaldehydes (2a-e)

A mixture of 4-hydroxy benzaldehyde (5 g, 40.9 mmol, 1equiv.), *n*-alkylbromide (41.4 mmol, 1.2 equiv.), anhydrous K<sub>2</sub>CO<sub>3</sub> (11.3 g, 81.9 mmol, 2 equiv.) and butanone was heated under reflux in an inert atmosphere for 12 h. After cooling, the reaction mixture was poured into ice-cold water and the product was extracted into dichloromethane (CH<sub>2</sub>Cl<sub>2</sub>) (50ml × 3). The combined organic layers were washed with cold aqueous NaOH solution (25 ml × 3), water (25 ml × 3), brine, dried over anhydrous Na<sub>2</sub>SO<sub>4</sub> and the solvent was removed *in vacuo*. The crude product was purified by column chromatography on silica gel (100-200 mesh) with a 10% mixture of ethyl acetate-hexanes as the eluent.

**2a.** A colorless liquid; *R<sub>f</sub>* = 0.5 (30% CH<sub>2</sub>Cl<sub>2</sub>-hexanes); yield: 7.7 g (80 %); IR (KBr Pellet):  $\nu_{\max}$  in cm<sup>-1</sup> 2958, 2873, 1696, 1601, 1508, 1312, 1259, 1160 and 833; <sup>1</sup>H NMR (400 MHz, CDCl<sub>3</sub>):  $\delta$  9.9 (s, 1H, 1 × CHO), 7.82 (d, *J* = 8.4 Hz, 2H, Ar), 6.99 (d, *J* = 8.8 Hz, 2H, Ar), 4.04 (t, *J* = 6.4 Hz, 2H, 1 × OCH<sub>2</sub>), 1.88-1.31 (m, 12H, 6 × CH<sub>2</sub>), 0.87 (t, *J* = 6.6 Hz, 3H, 1 × CH<sub>3</sub>); MS (FAB+): *m/z* for C<sub>15</sub>H<sub>23</sub>O<sub>2</sub>(M+1), Calculated: 235.2, Found: 235.2.

**2b.** A colorless liquid; *R<sub>f</sub>* = 0.5 (30% CH<sub>2</sub>Cl<sub>2</sub>-hexanes); yield: 8.3 g (82 %); IR (KBr Pellet):  $\nu_{\max}$  in cm<sup>-1</sup> 2959, 2877, 1699, 1601, 1510, 1312, 1259, 1160 and 833; <sup>1</sup>H NMR (400 MHz, CDCl<sub>3</sub>):  $\delta$  9.9 (s, 1H, 1 × CHO), 7.82 (d, *J* = 8.4 Hz, 2H, Ar), 6.99 (d, *J* = 8.8 Hz, 2H, Ar), 4.04 (t, *J* = 6.4 Hz, 2H, 1 × OCH<sub>2</sub>), 1.88-1.31 (m, 14H, 7 × CH<sub>2</sub>), 0.87 (t, *J* = 6.6 Hz, 3H, 1 × CH<sub>3</sub>); MS (FAB+): *m/z* for C<sub>16</sub>H<sub>25</sub>O<sub>2</sub>(M+1), Calculated: 249.2, Found: 249.2.

**2c.** A colorless liquid; *R<sub>f</sub>* = 0.52 (30% CH<sub>2</sub>Cl<sub>2</sub>-hexanes); yield: 9.1 g (85 %); IR (KBr Pellet):  $\nu_{\max}$  in cm<sup>-1</sup> 2960, 2878, 1698, 1605, 1510, 1314, 1260, 1162 and 835; <sup>1</sup>H NMR (400 MHz, CDCl<sub>3</sub>):  $\delta$  9.9 (s, 1H, 1 × CHO), 7.82 (d, *J* = 8.4 Hz, 2H, Ar), 6.99 (d, *J* =

8.8 Hz, 2H, Ar), 4.04 (t,  $J = 6.4$  Hz, 2H,  $1 \times \text{OCH}_2$ ), 1.88-1.31 (m, 16H,  $8 \times \text{CH}_2$ ), 0.87 (t,  $J = 6.6$  Hz, 3H,  $1 \times \text{CH}_3$ ); MS (FAB+):  $m/z$  for  $\text{C}_{17}\text{H}_{27}\text{O}_2(\text{M}+1)$ , Calculated: 263.2, Found: 263.2.

**2d.** A low melting solid;  $R_f = 0.52$  (30%  $\text{CH}_2\text{Cl}_2$ -hexanes); yield: 8.8 g (78 %); IR (KBr Pellet):  $\nu_{\text{max}}$  in  $\text{cm}^{-1}$  2962, 2877, 1700, 1606, 1511, 1315, 1262, 1164 and 838;  $^1\text{H}$  NMR (400 MHz,  $\text{CDCl}_3$ ):  $\delta$  9.9 (s, 1H,  $1 \times \text{CHO}$ ), 7.82 (d,  $J = 8.4$  Hz, 2H, Ar), 6.99 (d,  $J = 8.8$  Hz, 2H, Ar), 4.04 (t,  $J = 6.4$  Hz, 2H,  $1 \times \text{OCH}_2$ ), 1.88-1.31 (m, 18H,  $9 \times \text{CH}_2$ ), 0.87 (t,  $J = 6.6$  Hz, 3H,  $1 \times \text{CH}_3$ ); MS (FAB+):  $m/z$  for  $\text{C}_{18}\text{H}_{29}\text{O}_2(\text{M}+1)$ , Calculated: 277.2, Found: 277.2.

**2e.** A low melting solid;  $R_f = 0.53$  (30%  $\text{CH}_2\text{Cl}_2$ -hexanes); yield: 10.1 g (85 %); IR (KBr Pellet):  $\nu_{\text{max}}$  in  $\text{cm}^{-1}$  2959, 2874, 1699, 1602, 1509, 1313, 1259, 1161 and 836;  $^1\text{H}$  NMR (400 MHz,  $\text{CDCl}_3$ ):  $\delta$  9.9 (s, 1H,  $1 \times \text{CHO}$ ), 7.82 (d,  $J = 8.4$  Hz, 2H, Ar), 6.99 (d,  $J = 8.8$  Hz, 2H, Ar), 4.04 (t,  $J = 6.4$  Hz, 2H,  $1 \times \text{OCH}_2$ ), 1.88-1.31 (m, 20H,  $10 \times \text{CH}_2$ ), 0.87 (t,  $J = 6.6$  Hz, 3H,  $1 \times \text{CH}_3$ ); MS (FAB+):  $m/z$  for  $\text{C}_{19}\text{H}_{31}\text{O}_2(\text{M}+1)$ , Calculated: 291.2, Found: 291.2.

### I.2.2. General procedure for the synthesis of hydroxy chalcones 3a-e

A mixture of the appropriate aldehyde (**2a-e**) (2.93 g, 12.5 mmol, 1.0 equiv.) and 3-hydroxyacetophenone (1.7 g, 12.5 mmol, 1.0 equiv.) was dissolved in methanol (25 ml). To this, a solution of KOH (2.52 g, 45 mmol, 3.6 equiv.) in minimum quantity of methanol was added with vigorous stirring at ambient temperature. The resultant reaction mixture was heated under reflux for 12 h; excess of methanol was removed and the residue was acidified with cold 1N HCl solution. A pale yellow solid separated was filtered, dissolved in  $\text{CH}_2\text{Cl}_2$  and dried over anhydrous  $\text{Na}_2\text{SO}_4$ . Evaporation of  $\text{CH}_2\text{Cl}_2$  yielded the crude chalcone that was purified by column chromatography on silica gel (60-120) with a 10% mixture of ethyl acetate-hexanes as the eluent.

**3a.** A yellow solid;  $R_f = 0.31$  (10% EtOAc-hexanes); yield: 3.43 g (78%); m.p.: 99 °C IR (KBr Pellet)  $\nu_{\max}$  in  $\text{cm}^{-1}$ : 3379, 2925, 1651, 1563, 1510, 1444, 1296, 1250, 1170, 830, 789 and 575;  $^1\text{H NMR}$  (200 MHz,  $\text{CDCl}_3$ ):  $\delta$  7.8 (d,  $J = 15.6$  Hz, 1H, 1  $\times$  olefinic H), 7.6-7.61 (bd,  $J = 8.6$  Hz, 4H, Ar), 7.38 (t,  $J = 8.2$  Hz, 15.6 Hz, 2H, 1  $\times$  olefinic H, 1  $\times$  Ar), 7.1 (dd,  $J = 1.8$  Hz, 8.1 Hz, 1H, Ar), 6.92 (d,  $J = 8.6$  Hz, 2H, Ar), 5.7 (s, 1H, 1  $\times$  OH), 4.0 (t,  $J = 6.4$  Hz, 2H, 1  $\times$   $\text{OCH}_2$ ), 1.87-0.86 (m, 15H, 6  $\times$   $\text{CH}_2$ , 1  $\times$   $\text{CH}_3$ ); MS (FAB+): m/z for  $\text{C}_{23}\text{H}_{29}\text{O}_3(\text{M}+1)$ , Calculated: 353.2, Found: 353.2

**3b.** A yellow solid;  $R_f = 0.32$  (10% EtOAc-hexanes), yield: 3.48 g (76%); m.p.: 108 °C IR (KBr Pellet)  $\nu_{\max}$  in  $\text{cm}^{-1}$ : 3382, 2921, 2849, 1656, 1564, 1510, 1448, 1296, 1253, 1170, 825, 792 and 575;  $^1\text{H NMR}$  (200 MHz,  $\text{CDCl}_3$ ):  $\delta$  7.8 (d,  $J = 15.6$  Hz, 1H, 1  $\times$  olefinic H), 7.54-7.61 (bd,  $J = 8.6$  Hz, 4H, 4  $\times$  Ar), 7.38 (t,  $J = 8.2$  Hz, 15.6 Hz, 2H, 1  $\times$  olefinic H, 1  $\times$  Ar), 7.1 (dd,  $J = 2.2$  Hz, 7.8 Hz, 1H, Ar), 6.92 (d,  $J = 8.6$  Hz, 2H, Ar), 5.4 (s, 1H, 1  $\times$  OH), 4.0 (t,  $J = 6.4$  Hz, 2H, 1  $\times$   $\text{OCH}_2$ ), 1.87-0.86 (m, 17H, 7  $\times$   $\text{CH}_2$ , 1  $\times$   $\text{CH}_3$ ); MS (FAB+): m/z for  $\text{C}_{24}\text{H}_{30}\text{O}_3$ , Calculated: 366.2, Found: 366.8.

**3c.** A cream colored solid;  $R_f = 0.32$  (10% EtOAc-hexanes); yield: 3.57 g (75%); m.p.: 101 °C; IR (KBr Pellet)  $\nu_{\max}$  in  $\text{cm}^{-1}$ : 3375, 2922, 2851, 1661, 1580, 1566, 1510, 1447, 1295, 1253, 1168, 827, and 575;  $^1\text{H NMR}$  (200 MHz,  $\text{CDCl}_3$ ):  $\delta$  7.8 (d,  $J = 15.6$  Hz, 1H, 1  $\times$  olefinic H), 7.54-7.61 (bd,  $J = 8.6$  Hz, 4H, Ar), 7.38 (t,  $J = 8.2$  Hz, 15.6 Hz, 2H, 1  $\times$  olefinic H, 1  $\times$  Ar), 7.1 (dd,  $J = 2.2$  Hz, 7.8 Hz, 1H, Ar), 6.92 (d,  $J = 8.6$  Hz, 2H, Ar), 5.4 (s, 1H, 1  $\times$  OH), 4.0 (t,  $J = 6.4$  Hz, 2H, 1  $\times$   $\text{OCH}_2$ ), 1.84-0.85 (m, 19H, 8  $\times$   $\text{CH}_2$ , 1  $\times$   $\text{CH}_3$ ); MS (FAB+): m/z for  $\text{C}_{25}\text{H}_{33}\text{O}_3(\text{M}+1)$ , Calculated: 381.2, Found: 381.2.

**3d.** A cream colored solid;  $R_f = 0.33$  (10% EtOAc-hexanes); yield: 3.85 g (78%); m.p.: 118 °C; IR (KBr Pellet)  $\nu_{\max}$  in  $\text{cm}^{-1}$ : 3382, 2920, 2850, 1656, 1564, 1566, 1511, 1448, 1296, 1253, 1170, 984, 825 and 575;  $^1\text{H NMR}$  (200 MHz,  $\text{CDCl}_3$ ):  $\delta$  7.8 (d,  $J =$

15.6 Hz, 1H, 1 × olefinic H), 7.54-7.61 (bd,  $J = 8.6$  Hz, 4H, Ar), 7.38 (t,  $J = 8.2$  Hz, 15.6 Hz, 2H, 1 × olefinic H, 1 × Ar), 7.1 (dd,  $J = 2.2$  Hz, 7.8 Hz, 1H, Ar), 6.92 (d,  $J = 8.6$  Hz, 2H, Ar), 5.4 (s, 1H, 1 × OH), 4.0 (t,  $J = 6.4$  Hz, 2H, 1 × OCH<sub>2</sub>), 1.84-0.85 (m, 21H, 9 × CH<sub>2</sub>, 1 × CH<sub>3</sub>); MS (FAB+):  $m/z$  for C<sub>26</sub>H<sub>35</sub>O<sub>3</sub>(M+1), Calculated: 395.5, Found: 395.3.

**3e.** A cream colored solid;  $R_f = 0.36$  (70% CH<sub>2</sub>Cl<sub>2</sub>-hexanes); yield: 4.1 g (80%); m.p.: 104 °C; IR (KBr Pellet)  $\nu_{\max}$  in cm<sup>-1</sup>: 3376, 2921, 2850, 1660, 1580, 1566, 1510, 1448, 1295, 1252, 1168, 986, 827 and 576; <sup>1</sup>H NMR (200 MHz, CDCl<sub>3</sub>):  $\delta$  7.8 (d,  $J = 15.6$  Hz, 1H, 1 × olefinic H), 7.54-7.61 (bd,  $J = 8.6$  Hz, 4H, Ar), 7.38 (t,  $J = 8.2$  Hz, 15.6 Hz, 2H, 1 × olefinic H, 1 × Ar), 7.1 (dd,  $J = 2.2$  Hz, 7.8 Hz, 1H, Ar), 6.92 (d,  $J = 8.6$  Hz, 2H, Ar), 5.4 (s, 1H, 1 × OH), 4.0 (t,  $J = 6.4$  Hz, 2H, 1 × OCH<sub>2</sub>), 1.81-0.85 (m, 23H, 10 × CH<sub>2</sub>, 1 × CH<sub>3</sub>); MS (FAB+):  $m/z$  for C<sub>27</sub>H<sub>37</sub>O<sub>3</sub>(M+1), Calculated: 409.3, Found: 409.3

### **I.2.3. General procedures for the synthesis of dimers of series-1 (3DC-n,m series)**

A mixture of the appropriate cholesteryl  $\omega$ -bromoalkanoate (**1a-d**) (0.26 mmol, 1equiv.), hydroxy chalcone (**3a-e**) (0.26 mmol, 1equiv.), anhydrous K<sub>2</sub>CO<sub>3</sub> (0.072 g, 0.52 mmol, 4 equiv.) and dry DMF (5-6 ml) was heated at 80 °C for 12 h under nitrogen atmosphere. The reaction mixture was allowed to attain room temperature and poured into ice-cold water. The product was extracted into CH<sub>2</sub>Cl<sub>2</sub> (30ml × 3) and dried over Na<sub>2</sub>SO<sub>4</sub>. The crude compound obtained after the evaporation of CH<sub>2</sub>Cl<sub>2</sub> was purified by column chromatography (neutral alumina) using a mixture of 10% CH<sub>2</sub>Cl<sub>2</sub>-hexanes as an eluent. Off-white solid obtained was further purified by repeated recrystallization in a mixture of CH<sub>2</sub>Cl<sub>2</sub>-hexanes (1:9) until a constant clearing (isotropic) temperature was obtained.

**3DC-3,8.** A cream colored solid;  $R_f = 0.34$  (10% EtOAc-hexanes); yield: 0.164 g (78%); UV-Vis:  $\lambda_{\max} = 341.7$  nm,  $\epsilon = 2.5 \times 10^4$  L mol<sup>-1</sup>cm<sup>-1</sup>,  $\lambda_{\max} = 250.8$  nm,  $\epsilon = 2.1 \times 10^4$  L mol<sup>-1</sup>cm<sup>-1</sup>; IR (KBr Pellet)  $\nu_{\max}$  in cm<sup>-1</sup>: 2938, 2851, 1734, 1655, 1584, 1568, 1510, 1473, 1438, 1293, 1252, 1168, 827, 790, 574; <sup>1</sup>H NMR (400 MHz, CDCl<sub>3</sub>):  $\delta$  7.78 (d,  $J = 15.6$  Hz, 1H, 1  $\times$  olefinic H), 7.58-7.60 (m, 2H, 1  $\times$  Ar, 1  $\times$  olefinic H), 7.52 (s, 1H, 1  $\times$  Ar), 7.4 (d,  $J = 6.8$  Hz, 2H, Ar), 7.38 (d,  $J = 8.7$  Hz, 1H, Ar), 7.11 (dd,  $J = 2.2$  Hz, 8.1 Hz, 1H, Ar), 6.92 (d,  $J = 8.8$  Hz, 2H, Ar), 5.3 (d,  $J = 4.0$  Hz, 1H, 1  $\times$  olefinic H), 4.61-4.65 (m, 1H, 1  $\times$  CHOCO), 4.09 (t,  $J = 6.1$  Hz, 2H, 1  $\times$  OCH<sub>2</sub>), 4.0 (t,  $J = 6.5$  Hz, 2H, 1  $\times$  OCH<sub>2</sub>), 2.51 (t,  $J = 7.2$  Hz, 2H, 1  $\times$  CH<sub>2</sub>), 2.17-0.67 (m, 45H, 1  $\times$  CH<sub>3</sub>, 18  $\times$  CH<sub>2</sub>, 6  $\times$  CH), 1.01 (s, 3H, 1  $\times$  CH<sub>3</sub>), 0.91 (d,  $J = 6.48$  Hz, 3H, 1  $\times$  CH<sub>3</sub>), 0.87 (d,  $J = 1.5$  Hz, 3H, 1  $\times$  CH<sub>3</sub>), 0.86 (d,  $J = 1.6$  Hz, 3H, 1  $\times$  CH<sub>3</sub>), 0.67 (s, 3H, 1  $\times$  CH<sub>3</sub>); <sup>13</sup>C NMR (100 MHz, CDCl<sub>3</sub>):  $\delta$  190.23, 172.41, 161.43, 159.26, 144.74, 140.16, 139.74, 130.19, 129.49, 127.62, 122.64, 120.99, 119.96, 119.33, 115.07, 113.93, 74.16, 68.33, 67.25, 56.81, 56.34, 50.2, 42.42, 39.86, 39.58, 38.23, 37.08, 36.67, 36.28, 35.79, 31.96, 31.78, 31.18, 29.31, 29.20, 28.19, 28.0; MS (FAB+): m/z for C<sub>54</sub>H<sub>79</sub>O<sub>5</sub>(M+1), Calculated: 807.6. Found: 807.6; Anal. calcd for C<sub>54</sub>H<sub>78</sub>O<sub>5</sub> (found) %: C 80.35 (80.75) and H 9.74 (9.30).

**3DC-3,9.** A cream colored solid;  $R_f = 0.34$  (10%EtOAc-hexanes); yield: 0.164 g (77%); UV-Vis:  $\lambda_{\max} = 345$  nm,  $\epsilon = 20.9 \times 10^4$  L mol<sup>-1</sup>cm<sup>-1</sup>,  $\lambda_{\max} = 247$  nm,  $\epsilon = 1.9 \times 10^4$  L mol<sup>-1</sup>cm<sup>-1</sup>, IR (KBr Pellet)  $\nu_{\max}$  in cm<sup>-1</sup>: 2935, 2851, 1723, 1659, 1573, 1512, 1446, 1293, 1248, 1174, 1041, 828, 576; <sup>1</sup>H NMR (400 MHz, CDCl<sub>3</sub>):  $\delta$  7.78 (d,  $J = 15.6$  Hz, 1H, 1  $\times$  olefinic H), 7.58-7.60 (m, 2H, 1  $\times$  Ar, 1  $\times$  olefinic H), 7.53 (s, 1H, Ar), 7.4 (d,  $J = 7.4$  Hz, 2H, Ar), 7.38 (d,  $J = 8.2$  Hz, 1H, Ar), 7.11 (d,  $J = 2.1$  Hz, 1H, 1  $\times$  Ar), 6.92 (d,  $J = 8.8$  Hz, 2H, Ar), 5.36 (d,  $J = 4.2$  Hz, 1H, 1  $\times$  olefinic H), 4.63-4.65 (m, 1H, 1  $\times$  CHOCO), 4.09 (t,  $J = 6.2$  Hz, 2H, 1  $\times$  OCH<sub>2</sub>), 4.0 (t,  $J = 6.6$  Hz, 2H, 1  $\times$  OCH<sub>2</sub>), 2.52 (t,  $J = 7.2$  Hz, 2H, 1  $\times$  CH<sub>2</sub>), 2.14-0.67 (m, 50H, 2  $\times$  CH<sub>3</sub>, 19  $\times$  CH<sub>2</sub>, 6  $\times$  CH), 1.01 (s, 3H, 1  $\times$  CH<sub>3</sub>), 0.87 (d,  $J = 1.8$  Hz, 3H, 1  $\times$  CH<sub>3</sub>), 0.86 (d,  $J = 1.8$  Hz, 3H, 1  $\times$  CH<sub>3</sub>), 0.67 (s, 3H, 1  $\times$  CH<sub>3</sub>); MS (FAB+): m/z for C<sub>55</sub>H<sub>80</sub>O<sub>5</sub>, Calculated: 820.6. Found: 820.4; Anal. calcd for C<sub>55</sub>H<sub>80</sub>O<sub>5</sub>(found) %: C 80.44 (80.2) and H 9.82 (9.8).

**3DC-3,10.** A cream colored solid;  $R_f = 0.33$ (10%EtOAc-hexanes); yield: 0.169 g (78%); UV-Vis:  $\lambda_{\max} = 342$  nm,  $\epsilon = 1.36 \times 10^4$  L mol<sup>-1</sup>cm<sup>-1</sup>,  $\lambda_{\max} = 251.3$  nm,  $\epsilon = 1.21 \times 10^4$  L mol<sup>-1</sup>cm<sup>-1</sup>; IR (KBr Pellet)  $\nu_{\max}$  in cm<sup>-1</sup>: 2935, 2852, 1723, 1659, 1591, 1573, 1512, 1446, 1293, 1248, 1174, 1042, 829, 576; <sup>1</sup>H NMR (400 MHz, CDCl<sub>3</sub>):  $\delta$  7.79 (d,  $J = 15.6$  Hz, 1H, 1  $\times$  olefinic H), 7.60 (d,  $J = 8.7$  Hz, 1H, Ar) 7.59 (d,  $J = 11.7$  Hz, 1  $\times$  olefinic H), 7.52 (s, 1H, Ar), 7.4 (d,  $J = 7.4$  Hz, 2H, Ar), 7.38 (d,  $J = 8.2$  Hz, 1H, Ar), 7.1 (dd,  $J = 2.1$  Hz, 8 Hz, 1H, Ar), 6.92 (d,  $J = 8.8$  Hz, 2H, Ar), 5.36 (d,  $J = 4.2$  Hz, 1H, 1  $\times$  olefinic H), 4.63-4.65 (m, 1H, 1  $\times$  CHOCO), 4.09 (t,  $J = 6.2$  Hz, 2H, 1  $\times$  OCH<sub>2</sub>), 4.0 (t,  $J = 6.6$  Hz, 2H, 1  $\times$  OCH<sub>2</sub>), 2.52 (t,  $J = 7.2$  Hz, 2H, 1  $\times$  CH<sub>2</sub>), 2.14-0.67(m, 52H, 2  $\times$  CH<sub>3</sub>, 20  $\times$  CH<sub>2</sub>, 6  $\times$  CH), 1.01 (s, 3H, 1  $\times$  CH<sub>3</sub>), 0.87 (d,  $J = 1.8$  Hz, 3H, 1  $\times$  CH<sub>3</sub>), 0.86 (d,  $J = 1.8$  Hz, 3H, 1  $\times$  CH<sub>3</sub>), 0.67 (s, 3H, 1  $\times$  CH<sub>3</sub>); MS (FAB<sup>+</sup>):  $m/z$  for C<sub>56</sub>H<sub>83</sub>O<sub>5</sub>(M+1), Calculated: 835.6, Found: 835.6; Anal. calcd for C<sub>56</sub>H<sub>82</sub>O<sub>5</sub> (found) %: C 80.53 (80.6) and H 9.90 (9.9).

**3DC-3,11.** A cream colored solid;  $R_f = 0.36$  (10%EtOAc-hexanes); yield: 0.172 g (78%); UV-Vis:  $\lambda_{\max} = 342.4$  nm,  $\epsilon = 2.4 \times 10^4$  L mol<sup>-1</sup>cm<sup>-1</sup>,  $\lambda_{\max} = 243.1$ nm,  $\epsilon = 1.6 \times 10^4$  L mol<sup>-1</sup>cm<sup>-1</sup>, IR (KBr Pellet)  $\nu_{\max}$  in cm<sup>-1</sup>: 2936, 2851, 1723, 1656, 1591, 1571, 1511, 1293, 1248, 1172, 982, 830, 785 and 576; <sup>1</sup>H NMR (400 MHz, CDCl<sub>3</sub>):  $\delta$  7.78 (d,  $J = 15.6$  Hz, 1H, 1  $\times$  olefinic H), 7.60 (d,  $J = 8.7$  Hz, 1H, Ar) 7.58 (d,  $J = 12$  Hz, 1  $\times$  olefinic H), 7.52 (s, 1H, Ar), 7.41 (d,  $J = 8.4$  Hz, 2H, Ar), 7.38 (d,  $J = 8.3$  Hz, 1H, Ar), 7.11 (dd,  $J = 1.9$  Hz, 8 Hz, 1H, Ar), 6.92 (d,  $J = 8.7$  Hz, 2H, Ar), 5.36 (d,  $J = 3.7$  Hz, 1H, 1  $\times$  olefinic H), 4.63-4.65 (m, 1H, 1  $\times$  CHOCO), 4.09 (t,  $J = 6.0$  Hz, 2H, 1  $\times$  OCH<sub>2</sub>), 3.99 (t,  $J = 6.5$  Hz, 2H, 1  $\times$  OCH<sub>2</sub>), 2.51 (t,  $J = 7.2$  Hz, 2H, 1  $\times$  CH<sub>2</sub>), 2.32-0.67(m, 54H, 2  $\times$  CH<sub>3</sub>, 21  $\times$  CH<sub>2</sub>, 6  $\times$  CH), 1.01 (s, 3H, 1  $\times$  CH<sub>3</sub>), 0.87 (d,  $J = 1.6$  Hz, 3H, 1  $\times$  CH<sub>3</sub>), 0.86 (d,  $J = 1.5$  Hz, 3H, 1  $\times$  CH<sub>3</sub>), 0.67 (s, 3H, 1  $\times$  CH<sub>3</sub>); MS (FAB<sup>+</sup>):  $m/z$  for C<sub>57</sub>H<sub>85</sub>O<sub>5</sub>(M+1), Calculated: 849.6, Found: 849.6; Anal. calcd for C<sub>57</sub>H<sub>84</sub>O<sub>5</sub> (found) %: C 80.61 (80.5) and H 9.97 (9.7).



**3DC-3,12.** A cream colored solid;  $R_f = 0.37$  (10%EtOAc-hexanes); yield: 0.193 g (86 %); UV-Vis:  $\lambda_{\max} = 342.4$  nm,  $\epsilon = 1.63 \times 10^4$  L mol<sup>-1</sup>cm<sup>-1</sup>,  $\lambda_{\max} = 248.2$  nm,  $\epsilon = 1.4 \times 10^4$  L mol<sup>-1</sup>cm<sup>-1</sup>, IR (KBr Pellet)  $\nu_{\max}$  in cm<sup>-1</sup>: 2925, 2851, 1724, 1659, 1572, 1512, 1444, 1293, 1248, 1174, 829 and 576; <sup>1</sup>H NMR (400 MHz, CDCl<sub>3</sub>):  $\delta$  7.78 (d,  $J = 15.6$  Hz, 1H, 1  $\times$  olefinic H), 7.60 (d,  $J = 8.7$  Hz, 1H, Ar) 7.59 (d,  $J = 12$  Hz, 1H, 1  $\times$  olefinic H), 7.52 (s, 1H, Ar), 7.39 (d,  $J = 7.1$  Hz, 1H, Ar), 7.37 (d,  $J = 8.5$  Hz, 1H, Ar), 7.11 (dd,  $J = 1.9$  Hz, 8 Hz, 2H, Ar), 6.92 (d,  $J = 8.7$  Hz, 2H, Ar), 5.34 (d,  $J = 4.0$  Hz, 1H, 1 $\times$ olefinic H), 4.61-4.65 (m, 1H, 1 $\times$ CHOCO), 4.09 (t,  $J = 6.6$  Hz, 2H, 1  $\times$  OCH<sub>2</sub>), 4.0 (t,  $J = 6.1$  Hz, 2H, 1  $\times$  OCH<sub>2</sub>), 2.51 (t,  $J = 7.2$  Hz, 2H, 1  $\times$  CH<sub>2</sub>), 2.2-0.67 (m, 53H, 1  $\times$  CH<sub>3</sub>, 22 $\times$  CH<sub>2</sub>, 6  $\times$  CH), 1.01 (s, 3H, 1  $\times$  CH<sub>3</sub>), 0.88 (d,  $J = 2.8$  Hz, 3H, 1  $\times$  CH<sub>3</sub>), 0.87 (d,  $J = 2.4$  Hz, 3H, 1  $\times$  CH<sub>3</sub>), 0.85 (d,  $J = 1.7$  Hz, 3H, 1  $\times$  CH<sub>3</sub>), 0.67 (s, 3H, 1  $\times$  CH<sub>3</sub>); MS (FAB+): m/z for C<sub>58</sub>H<sub>87</sub>O<sub>5</sub>(M+1), Calculated: 863.6. Found: 863.4; Anal. calcd for C<sub>58</sub>H<sub>86</sub>O<sub>5</sub> (found) %: C 80.69 (80.7) and H 10.04 (9.8).

**3DC-4,8.** A colorless solid;  $R_f = 0.30$ (10%EtOAc-hexanes); yield: 0.149 g (70%); UV-Vis:  $\lambda_{\max} = 346.9$  nm,  $\epsilon = 1.8 \times 10^4$  L mol<sup>-1</sup>cm<sup>-1</sup>,  $\lambda_{\max} = 247.1$ nm,  $\epsilon = 1.5 \times 10^4$  L mol<sup>-1</sup>cm<sup>-1</sup>, IR (KBr Pellet)  $\nu_{\max}$  in cm<sup>-1</sup>:2934, 2866, 2365, 1726, 1659, 1591, 1569, 1512, 1448, 1290, 1249, 1174, 1043, 829, 786 and 572; <sup>1</sup>H NMR (400 MHz, CDCl<sub>3</sub>):  $\delta$  7.77 (d,  $J = 15.6$  Hz, 1H, 1 $\times$ olefinic H), 7.59 (d,  $J = 6.9$  Hz, 2H, Ar) 7.56 (d,  $J = 15.9$  Hz, 1H, 1  $\times$  olefinic H), 7.51 (s, 1H, Ar), 7.39 (d,  $J = 6.5$  Hz, 1H, Ar), 7.38 (d,  $J = 9.0$  Hz, 1H, Ar), 7.09 (dd,  $J = 1.9$  Hz, 7.8 Hz, 1H, Ar), 6.91 (d,  $J = 8.7$  Hz, 2H, Ar), 5.36 (d,  $J = 3.6$  Hz, 1H, 1  $\times$  olefinic H), 4.63 (m, 1H, 1 $\times$ CHOCO), 4.04 (m, 2H, 1  $\times$  OCH<sub>2</sub>), 3.99 (t,  $J = 6.6$  Hz, 2H, 1  $\times$  OCH<sub>2</sub>), 2.37(t,  $J = 6.3$  Hz, 2H, 1  $\times$  CH<sub>2</sub>) 2.31-0.67 (m, 47H, 1  $\times$  CH<sub>3</sub>, 19  $\times$  CH<sub>2</sub>, 6  $\times$  CH), 1.01 (s, 3H, 1  $\times$  CH<sub>3</sub>), 0.90 (d,  $J = 6.4$  Hz, 3H, 1  $\times$  CH<sub>3</sub>), 0.87 (d,  $J = 1.8$  Hz, 3H, 1 $\times$  CH<sub>3</sub>), 0.85 (d,  $J = 1.9$  Hz, 3H, 1  $\times$  CH<sub>3</sub>), 0.67 (s, 3H, 1  $\times$  CH<sub>3</sub>); <sup>13</sup>C NMR (100 MHz, CDCl<sub>3</sub>):  $\delta$  190.31, 172.77, 161.42, 159.34, 144.78, 140.08, 139.76, 130.24, 129.5, 127.56,122.64, 120.90, 119.88, 119.40, 115.03, 113.76, 73.98, 68.31, 67.75, 56.79, 56.28, 50.16, 42.40, 39.83, 39.56, 38.23, 37.07, 36.67, 36.26, 35.81, 34.32, 31.81, 29.34, 29.21, 28.68, 28.23, 28.03, 27.89, 26.04,

24.31; MS (FAB+):  $m/z$  for  $C_{55}H_{81}O_5(M+1)$  Calculated: 821.6, Found: 821.7; Anal. calcd for  $C_{55}H_{80}O_5$  (found) %: C 80.44 (80.4); H 9.82 (9.8).

**3DC-4.9.** A colorless solid;  $R_f = 0.32$  (10%EtOAc-hexanes); yield: 0.167 g (77%); UV-Vis:  $\lambda_{max} = 342$  nm,  $\epsilon = 0.1 \times 10^4$  L mol<sup>-1</sup>cm<sup>-1</sup>,  $\lambda_{max} = 255.4$  nm,  $\epsilon = 0.06 \times 10^4$  L mol<sup>-1</sup>cm<sup>-1</sup>, IR (KBr Pellet)  $\nu_{max}$  in cm<sup>-1</sup>:2934, 1726, 1660, 1592, 1569, 1512, 1448, 1291, 1250, 1173, 1042, 829, 787 and 574; <sup>1</sup>H NMR (400 MHz, CDCl<sub>3</sub>):  $\delta$  7.78 (d,  $J = 15.6$  Hz, 1H, 1  $\times$  olefinic H), 7.58 (d,  $J = 8.6$  Hz, 2H, Ar) 7.56 (d,  $J = 17.9$  Hz, 1H, 1 $\times$ olefinic H), 7.51 (s, 1H, Ar), 7.4 (dd,  $J = 6.5$  Hz, 2.5 Hz, 1H, Ar), 7.38 (dd,  $J = 9.0$  Hz, 3.8 Hz, 1H, Ar), 7.1 (dd,  $J = 1.9$  Hz, 7.8 Hz, 1H, Ar), 6.92 (d,  $J = 8.7$  Hz, 2H, Ar), 5.37 (d,  $J = 3.6$  Hz, 1H, 1 $\times$ olefinic H), 4.63 (m, 1H, 1  $\times$  CHOCO), 3.99-4.06 (m, 4H, 2 $\times$ OCH<sub>2</sub>), 2.38 (t,  $J = 4.4$  Hz, 2H, 1  $\times$  CH<sub>2</sub>), 2.02-0.67(m, 49H, 1 $\times$ CH<sub>3</sub>, 20 $\times$ CH<sub>2</sub>, 6 $\times$ CH), 1.01 (s, 3H, 1  $\times$  CH<sub>3</sub>), 0.91 (d,  $J = 6.6$  Hz, 3H, 1 $\times$  CH<sub>3</sub>), 0.87 (d,  $J = 1.6$  Hz, 3H, 1  $\times$  CH<sub>3</sub>), 0.86 (d,  $J = 1.6$  Hz, 3H, 1  $\times$  CH<sub>3</sub>), 0.67 (s, 3H, 1  $\times$  CH<sub>3</sub>); MS (FAB+):  $m/z$  for  $C_{56}H_{83}O_5 (M+1)$  Calculated: 835.6, Found: 835.4; Anal.calcd for  $C_{56}H_{82}O_5$  (found) %: C 80.53 (80.7); H 9.9 (9.9).

**3DC-4.10.** A cream colored solid;  $R_f = 0.32$  (10%EtOAc-hexanes); yield: 0.168 g (76%); UV-Vis:  $\lambda_{max} = 342.2$  nm,  $\epsilon = 1.7 \times 10^4$  L mol<sup>-1</sup>cm<sup>-1</sup>,  $\lambda_{max} = 246.8$  nm,  $\epsilon = 1.5 \times 10^4$  L mol<sup>-1</sup>cm<sup>-1</sup>, IR (KBr Pellet)  $\nu_{max}$  in cm<sup>-1</sup>:2928, 1732, 1658, 1590, 1569, 1511, 1448, 1291, 1250, 1173, 1017, 826 and 573; <sup>1</sup>H NMR (400 MHz, CDCl<sub>3</sub>):  $\delta$  7.78 (d,  $J = 12.6$  Hz, 1H, 1  $\times$  olefinic H), 7.59 (d,  $J = 6.8$  Hz, 2H, 2  $\times$  Ar) 7.58 (d,  $J = 17.9$  Hz, 1H, 1  $\times$  olefinic H), 7.52 (s, 1H, 1  $\times$  Ar), 7.39 (d,  $J = 8.1$ Hz, 1H, 1  $\times$  Ar), 7.38 (dd,  $J = 8.1$ Hz, 1H, Ar), 7.10 (dd,  $J = 2.1$ Hz, 8 Hz, 1H, Ar), 6.92 (d,  $J = 6.9$  Hz, 2H, Ar), 5.37 (d,  $J = 4.2$  Hz, 1H, 1 $\times$ olefinic H), 4.63 (m, 1H, 1  $\times$  CHOCO), 3.99-4.06 (m, 4H, 2  $\times$  OCH<sub>2</sub>), 2.38(t,  $J = 5.3$  Hz, 2H, 1  $\times$  CH<sub>2</sub>) 2.3-0.67(m, 48H, 1  $\times$  CH<sub>3</sub>, 21  $\times$  CH<sub>2</sub>, 6  $\times$  CH), 1.01 (s, 3H, 1  $\times$  CH<sub>3</sub>), 0.91 (d,  $J = 5.2$  Hz, 3H, 1 $\times$  CH<sub>3</sub>), 0.89 (d,  $J = 5.4$  Hz, 3H, 1  $\times$  CH<sub>3</sub>),0.87 (d,  $J = 1.4$  Hz, 3H, 1  $\times$  CH<sub>3</sub>), 0.86 (d,  $J = 1.6$  Hz, 3H, 1  $\times$

CH<sub>3</sub>), 0.67 (s, 3H, 1 × CH<sub>3</sub>); MS (FAB+): m/z for C<sub>57</sub>H<sub>84</sub>O<sub>5</sub>, Calculated: 848.6, Found: 848.9; Anal.calcd for C<sub>57</sub>H<sub>84</sub>O<sub>5</sub> (found) %: C 80.61 (80.5); H 9.9 (9.9) .

**3DC-4,11.** A colorless solid; *R<sub>f</sub>* = 0.39 (10%EtOAc-hexanes); yield: 0.179 g (80%); UV-Vis: λ<sub>max</sub> = 341.2nm, ε = 1.2 × 10<sup>4</sup> L mol<sup>-1</sup>cm<sup>-1</sup>, λ<sub>max</sub> = 250.9 nm, ε = 1.1 × 10<sup>4</sup> L mol<sup>-1</sup>cm<sup>-1</sup>, IR (KBr Pellet) ν<sub>max</sub> in cm<sup>-1</sup>:2926, 1731, 1655, 1592, 1570, 1511, 1467, 1450, 1290, 1249, 1173, 1044, 784 and 572; <sup>1</sup>H NMR (400 MHz, CDCl<sub>3</sub>): δ 7.78 (d, *J* = 12.6 Hz, 1H, 1 × olefinic H), 7.59 (d, *J* = 7.0 Hz, 2H, 2 × Ar) 7.58 (d, *J* = 12.4 Hz, 1H, 1 × olefinic H), 7.52 (s, 1H, Ar), 7.4 (d, *J* = 6.4 Hz, 1H, Ar), 7.38 (d, *J* = 6.4 Hz, 1H, Ar), 7.10 (dd, *J* = 1.8 Hz, 6.4 Hz, 1H, Ar), 6.92 (d, *J* = 7.0 Hz, 2H, Ar), 5.36 (d, *J* = 3.2 Hz, 1H, 1 × olefinic H), 4.62 (m, 1H, 1 × CHOCO), 4.06 (t, *J* = 4.4 Hz, 2H, 1 × OCH<sub>2</sub>), 4.0 (t, *J* = 5.2 Hz, 2H, 1×OCH<sub>2</sub>), 2.38 (d, *J* = 5.4 Hz, 2H, 1 × CH<sub>2</sub>) 2.37 - 0.67 (m, 53H, 1 × CH<sub>3</sub>, 22× CH<sub>2</sub>, 6 × CH), 1.01 (s, 3H, 1 × CH<sub>3</sub>), 0.91 (d, *J* = 5.2 Hz, 3H, 1 × CH<sub>3</sub>), 0.87 (d, *J* = 1.8 Hz, 3H, 1× CH<sub>3</sub>), 0.86 (d, *J* = 3.5 Hz, 3H, 1× CH<sub>3</sub>), 0.67 (s, 3H, 1 × CH<sub>3</sub>); MS (FAB+): m/z for C<sub>58</sub>H<sub>86</sub>O<sub>5</sub>, Calculated: 862.6, Found: 862.4; Anal.calcd for C<sub>58</sub>H<sub>86</sub>O<sub>5</sub> (found) %:C 80.69 (80.7); H 10.04 (10.5).

**3DC-4,12.** A cream colored solid; *R<sub>f</sub>* = 0.40 (10%EtOAc-hexanes); yield: 0.178 g (78%); UV-Vis: λ<sub>max</sub> = 344.9 nm, ε = 1.3 × 10<sup>4</sup> L mol<sup>-1</sup>cm<sup>-1</sup>, λ<sub>max</sub> = 245.7 nm, ε = 1.3 × 10<sup>6</sup> L mol<sup>-1</sup>cm<sup>-1</sup>, IR(KBr Pellet) ν<sub>max</sub> in cm<sup>-1</sup>: 2926, 2852, 1724, 1660, 1573, 1511, 1446, 1294, 1248, 1176, 830 and 578; <sup>1</sup>H NMR (400 MHz, CDCl<sub>3</sub>): δ 7.78 (d, *J* = 15.6 Hz, 1H, 1 × olefinic H), 7.59 (d, *J* = 6.8 Hz, 2H, Ar) 7.58 (d, *J* = 12.2 Hz, 1 × olefinic H), 7.52 (s, 1H, Ar), 7.39 (d, *J* = 7.2 Hz, 1H, Ar), 7.38 (d, *J* = 8.2 Hz, 1H, 1 × Ar), 7.1 (dd, *J* = 2.0 Hz, 8 Hz, 1H, 1 × Ar), 6.92 (d, *J* = 6.9 Hz, 2H, 2 × Ar), 5.37 (bd, *J* = 3.6 Hz, 1H, 1 × olefinic H), 4.61-4.65 (m, 1H, 1 × CHOCO), 3.99- 4.1 (m, 4H, 2 × OCH<sub>2</sub>), 2.38 (t, *J* = 5.4 Hz, 2H, 1 × CH<sub>2</sub>), 2.36-0.67(m, 52H, 23×CH<sub>2</sub>, 6 × CH), 1.01 (s, 3H, 1 × CH<sub>3</sub>), 0.91 (d, *J* = 5.2 Hz, 3H, 1× CH<sub>3</sub>), 0.88 (d, *J* = 5.3 Hz, 3H, 1× CH<sub>3</sub>), 0.87 (d, *J* = 1.6 Hz, 3H, 1 × CH<sub>3</sub>), 0.86 (d, *J* = 1.6 Hz, 3H, 1 × CH<sub>3</sub>), 0.67 (s, 3H,

1×CH<sub>3</sub>); MS (FAB+): m/z for C<sub>59</sub>H<sub>89</sub>O<sub>5</sub>(M+1) Calculated: 877.7, Found: 877.5; Anal. calcd for C<sub>59</sub>H<sub>88</sub>O<sub>5</sub> (found) %: C 80.77 (80.9) and H 10.11 (10.4).

**3DC-5,8.** A cream colored solid;  $R_f = 0.39$  (10%EtOAc-hexanes); yield: 0.174 g (80%); UV-Vis:  $\lambda_{\max} = 342.5$  nm,  $\epsilon = 0.9 \times 10^4$  L mol<sup>-1</sup>cm<sup>-1</sup>,  $\lambda_{\max} = 246.5$  nm,  $\epsilon = 0.8 \times 10^4$  L mol<sup>-1</sup>cm<sup>-1</sup>, IR (KBr Pellet)  $\nu_{\max}$  in cm<sup>-1</sup>: 2942, 2867, 2853, 1736, 1651, 1576, 1508, 1291, 1249, 1164, 1040, 827, 784 and 574; <sup>1</sup>H NMR (400 MHz, CDCl<sub>3</sub>):  $\delta$  7.77 (d,  $J = 15.6$  Hz, 1H, 1× olefinic H), 7.58 (d,  $J = 8.6$  Hz, 2H, Ar) 7.57 (d,  $J = 14.8$  Hz, 1× olefinic H), 7.52 (s, 1H, Ar), 7.38 (d,  $J = 7.5$  Hz, 1H, 1× Ar), 7.36 (d,  $J = 8.1$  Hz, 1H, Ar), 7.1 (d,  $J = 2.4$  Hz, 6 Hz, 1H, Ar), 6.91 (d,  $J = 8.7$  Hz, 2H, Ar), 5.35 (bd,  $J = 3.8$  Hz, 1H, 1× olefinic H), 4.62(m, 1H, 1× CHOCO), 3.99- 4.03 (m, 4H, 2× OCH<sub>2</sub>), 2.31(t,  $J = 7.5$  Hz, 2H, 1× CH<sub>2</sub>), 2.14-0.67(m, 49H, 20×CH<sub>2</sub>, 6× CH, 1× CH<sub>3</sub>), 1.01 (s, 3H, 1× CH<sub>3</sub>), 0.89 (d,  $J = 4.9$  Hz, 3H, 1× CH<sub>3</sub>), 0.86 (d,  $J = 1.6$  Hz, 3H, 1× CH<sub>3</sub>), 0.84 (d,  $J = 1.6$  Hz, 3H, 1× CH<sub>3</sub>), 0.66 (s, 3H, 1× CH<sub>3</sub>); <sup>13</sup>C NMR (100 MHz, CDCl<sub>3</sub>):  $\delta$  190.26, 172.91, 159.35, 144.70, 139.70, 130.17, 129.41, 122.55, 120.78, 119.79, 119.30, 114.95, 113.69, 73.81, 68.23, 67.92, 56.71, 56.20, 50.08, 42.32, 39.76, 39.51, 38.16, 37.00, 36.59, 36.19, 35.75, 34.55, 31.88, 31.75, 29.28, 29.15, 28.88, 28.17, 27.96, 27.82, 25.97, 25.6; MS (FAB+): m/z for C<sub>56</sub>H<sub>83</sub>O<sub>5</sub>(M+1) Calculated: 835.6, Found: 835.8; Anal. calcd for C<sub>56</sub>H<sub>82</sub>O<sub>5</sub> (found) %: C 80.53 (80.3); H 9.90 (10).

**3DC-5,9.** A cream colored solid;  $R_f = 0.37$  (10%EtOAc-hexanes); yield: 0.172 g (78%); UV-Vis:  $\lambda_{\max} = 349$  nm,  $\epsilon = 1.5 \times 10^4$  L mol<sup>-1</sup>cm<sup>-1</sup>,  $\lambda_{\max} = 239.1$  nm,  $\epsilon = 1.6 \times 10^4$  L mol<sup>-1</sup>cm<sup>-1</sup>, IR (KBr Pellet)  $\nu_{\max}$  in cm<sup>-1</sup>: 2942, 2854, 1736, 1651, 1566, 1509, 1291, 1250, 1165, 1039, 828, 785 and 574; <sup>1</sup>H NMR (400 MHz, CDCl<sub>3</sub>):  $\delta$  7.78 (d,  $J = 12.6$  Hz, 1H, 1× olefinic H), 7.59 (d,  $J = 7.0$  Hz, 2H, Ar) 7.58 (d,  $J = 13.6$  Hz, 1× olefinic H), 7.51 (s, 1H, Ar), 7.38 (d,  $J = 5.6$  Hz, 1H, Ar), 7.37(d,  $J = 6.9$  Hz, 1H, Ar), 7.1 (dd,  $J = 2.2$  Hz, 6.6 Hz, 1H, Ar), 6.92 (d,  $J = 6.8$  Hz, 2H, Ar), 5.37 (bd,  $J = 3.4$  Hz, 1H, 1× olefinic H), 4.63 (m, 1H, 1× CHOCO), 4.03 (t,  $J = 5.2$  Hz, 2H, 1×

OCH<sub>2</sub>), 4.0 (t,  $J = 5.24$  Hz, 2H, 1 × OCH<sub>2</sub>), 2.34-0.67 (m, 50H, 22 × CH<sub>2</sub>, 6 × CH), 1.01 (s, 3H, 1 × CH<sub>3</sub>), 0.94 (d,  $J = 4.1$  Hz, 3H, 1 × CH<sub>3</sub>), 0.91 (d,  $J = 5.2$  Hz, 3H, 1 × CH<sub>3</sub>), 0.87 (d,  $J = 1.3$  Hz, 3H, 1 × CH<sub>3</sub>), 0.86 (d,  $J = 1.4$  Hz, 3H, 1 × CH<sub>3</sub>), 0.67 (s, 3H, 1 × CH<sub>3</sub>); MS (FAB+):  $m/z$  for C<sub>57</sub>H<sub>85</sub>O<sub>5</sub>(M+1) Calculated: 849.6, Found: 849.6; Anal. calcd for C<sub>57</sub>H<sub>84</sub>O<sub>5</sub> (found) %:C 80.61 (80.8); H 9.97 (9.9).

**3DC-5,10.** A yellow colored solid;  $R_f = 0.37$  (10%EtOAc-hexanes); yield: 0.177 g (79%); UV-Vis:  $\lambda_{\max} = 341.7$  nm,  $\epsilon = 1.6 \times 10^4$  L mol<sup>-1</sup>cm<sup>-1</sup>,  $\lambda_{\max} = 245.3$  nm,  $\epsilon = 1.5 \times 10^4$  L mol<sup>-1</sup>cm<sup>-1</sup>, IR (KBr Pellet)  $\nu_{\max}$  in cm<sup>-1</sup>: 2940, 2853, 1737, 1652, 1566, 1509, 1291, 1250, 1166, 1039, 828, 784 and 574; <sup>1</sup>H NMR (400 MHz, CDCl<sub>3</sub>):  $\delta$  7.78 (d,  $J = 12.5$  Hz, 1H, 1 × olefinic H), 7.59 (d,  $J = 7.0$  Hz, 2H, Ar) 7.57 (d,  $J = 13.6$  Hz, 1 × olefinic H), 7.51 (s, 1H, Ar), 7.39(d,  $J = 5.5$  Hz, 1H, Ar), 7.38 (d,  $J = 6.9$  Hz, 1H, Ar), 7.1 (dd,  $J = 1.8$  Hz, 6.5 Hz, 1H, Ar), 6.92 (d,  $J = 7.0$  Hz, 2H, Ar), 5.37(d,  $J = 4.2$  Hz, 1H, 1 × olefinic H), 4.63 (m, 1H, 1 × CHOCO), 4.04 (t,  $J = 5.1$  Hz, 2H, 1 × OCH<sub>2</sub>), 4.0 (t,  $J = 5.20$  Hz, 2H, 1 × OCH<sub>2</sub>), 2.34-0.67 (m, 58H, 23 × CH<sub>2</sub>, 6 × CH, 2 × CH<sub>3</sub>), 1.01 (s, 3H, 1 × CH<sub>3</sub>), 0.88 (d,  $J = 4.6$  Hz, 3H, 1 × CH<sub>3</sub>), 0.86 (d,  $J = 3.6$  Hz, 3H, 1 × CH<sub>3</sub>), 0.67 (s, 3H, 1 × CH<sub>3</sub>); MS (FAB+):  $m/z$  for C<sub>58</sub>H<sub>86</sub>O<sub>5</sub>, Calculated: 862.6, Found: 862.9; Anal. calcd for C<sub>59</sub>H<sub>86</sub>O<sub>5</sub> (found) %:C 80.69 (80.7); H 10.04 (10).

**3DC-5,11.** A cream colored solid;  $R_f = 0.40$  (10%EtOAc-hexanes); yield: 0.194 g (85%); UV-Vis:  $\lambda_{\max} = 342.2$  nm,  $\epsilon = 1.6 \times 10^4$  L mol<sup>-1</sup>cm<sup>-1</sup>,  $\lambda_{\max} = 242.6$  nm,  $\epsilon = 1.4 \times 10^4$  L mol<sup>-1</sup>cm<sup>-1</sup>, IR (KBr Pellet)  $\nu_{\max}$  in cm<sup>-1</sup>: 2928, 2852, 1729, 1655, 1589, 1512, 1290, 1251, 1170, 1042, 829 and 786; <sup>1</sup>H NMR (400 MHz, CDCl<sub>3</sub>):  $\delta$  7.78 (d,  $J = 12.5$  Hz, 1H, 1 × olefinic H), 7.59 (d,  $J = 7.0$  Hz, 2H, Ar), 7.58 (d,  $J = 13.5$  Hz, 1 × olefinic H), 7.51 (s, 1H, Ar), 7.39 (d,  $J = 5.5$  Hz, 1H, Ar), 7.38(d,  $J = 7.0$  Hz, 1H, Ar), 7.1 (dd,  $J = 1.9$  Hz, 6.5 Hz, 1H, Ar), 6.92 (d,  $J = 6.9$  Hz, 2H, Ar), 5.37(d,  $J = 3.2$  Hz, 1H, 1 × olefinic H), 4.63 (m, 1H, 1 × CHOCO), 4.04 (t,  $J = 5.04$  Hz, 2H, 1 × OCH<sub>2</sub>), 4.0 (t,  $J = 5.2$  Hz, 2H, 1 × OCH<sub>2</sub>), 2.34-0.67(m, 57H, 24 × CH<sub>2</sub>, 6 × CH, 1 × CH<sub>3</sub>), 1.01 (s, 3H, 1 × CH<sub>3</sub>), 0.92 (d,  $J = 5.2$  Hz, 3H, 1 × CH<sub>3</sub>), 0.87 (d,  $J = 1.7$  Hz, 3H, 1 ×

CH<sub>3</sub>), 0.86 (d,  $J = 1.7$  Hz, 3H, 1 × CH<sub>3</sub>), 0.67 (s, 3H, 1 × CH<sub>3</sub>); MS (FAB+):  $m/z$  for C<sub>59</sub>H<sub>89</sub>O<sub>5</sub>(M+1) Calculated: 877.8, Found: 877.6; Anal. calcd for C<sub>59</sub>H<sub>88</sub>O<sub>5</sub> (found) %: C 80.77(81); H 10.11(10).

**3DC-5,12.** A yellow colored solid;  $R_f = 0.42$  (10%EtOAc-hexanes); yield: 0.171 g (74%); UV-Vis:  $\lambda_{\max} = 345$  nm,  $\epsilon = 3.2 \times 10^4$  L mol<sup>-1</sup>cm<sup>-1</sup>,  $\lambda_{\max} = 246.8$  nm,  $\epsilon = 2.6 \times 10^4$  L mol<sup>-1</sup>cm<sup>-1</sup>, IR (KBr Pellet)  $\nu_{\max}$  in cm<sup>-1</sup>: 2929, 2853, 1730, 1656, 1590, 1514, 1291, 1252, 1172, 1043, 830 and 787; <sup>1</sup>H NMR (400 MHz, CDCl<sub>3</sub>):  $\delta$  7.78 (d,  $J = 12.5$  Hz, 1H, 1×olefinic H), 7.59 (d,  $J = 7.0$  Hz, 2H, Ar), 7.58 (d,  $J = 13.4$  Hz, 1 × olefinic H), 7.51 (s, 1H, 1 × Ar), 7.39(d,  $J = 5.6$  Hz, 1H, Ar), 7.37(d,  $J = 6.9$  Hz, 1H, Ar), 7.1 (dd,  $J = 1.9$  Hz, 6.5 Hz, 1H, Ar), 6.92 (d,  $J = 7.0$  Hz, 2H, Ar), 5.37(d,  $J = 3.5$  Hz, 1H, 1 × olefinic H), 4.62 (m, 1H, 1 × CHOCO), 4.04 (t,  $J = 5.1$  Hz, 2H, 1 × OCH<sub>2</sub>), 4.0 (t,  $J = 5.2$  Hz, 2H, 1 × OCH<sub>2</sub>), 2.34-0.67(m, 56H, 25 × CH<sub>2</sub>, 6 × CH), 1.01 (s, 3H, 1 × CH<sub>3</sub>), 0.91 (d,  $J = 5.2$  Hz, 3H, 1 × CH<sub>3</sub>), 0.89 (d,  $J = 5.2$  Hz, 3H, 1 × CH<sub>3</sub>), 0.87 (d,  $J = 1.8$  Hz, 3H, 1 × CH<sub>3</sub>), 0.86 (d,  $J = 1.7$  Hz, 3H, 1 × CH<sub>3</sub>), 0.67(s, 3H, 1 × CH<sub>3</sub>); MS (FAB+):  $m/z$  for C<sub>60</sub>H<sub>91</sub>O<sub>5</sub>(M+1) Calculated: 891.7, Found: 891.6; Anal. calcd for C<sub>60</sub>H<sub>90</sub>O<sub>5</sub> (found) %: C 80.85 (80.5); H 10.18 (10.5).

**3DC-7,8.** A white colored solid;  $R_f = 0.35$  (10%EtOAc-hexanes); yield: 0.191 g (85%); UV-Vis:  $\lambda_{\max} = 342.2$  nm,  $\epsilon = 1.9 \times 10^4$  L mol<sup>-1</sup>cm<sup>-1</sup>,  $\lambda_{\max} = 248.4$  nm,  $\epsilon = 1.2 \times 10^4$  L mol<sup>-1</sup>cm<sup>-1</sup>, IR (KBr Pellet)  $\nu_{\max}$  in cm<sup>-1</sup>: 2933, 2867, 2360, 2343, 1728, 1659, 1572, 1511, 1291, 1250, 1173, 1027, 826 and 668; <sup>1</sup>H NMR (400 MHz, CDCl<sub>3</sub>):  $\delta$  7.78 (d,  $J = 12.6$  Hz, 1H, 1 × olefinic H), 7.59 (d,  $J = 7.0$  Hz, 2H, Ar) 7.57 (d,  $J = 14.8$  Hz, 1 × olefinic H), 7.52 (s, 1H, Ar), 7.38 (d,  $J = 6.3$  Hz, 1H, Ar), 7.36 (d,  $J = 6.3$  Hz, 1H, Ar), 7.11 (dd,  $J = 1.8$  Hz, 6.4 Hz, 1H, Ar), 6.92 (d,  $J = 7$  Hz, 2H, Ar), 5.36 (bd,  $J = 3.1$  Hz, 1H, 1 × olefinic H), 4.61(m, 1H, 1×CHOCO), 3.99- 4.04 (m, 4H, 2 × OCH<sub>2</sub>), 2.32-0.67 (m, 55H, 23 × CH<sub>2</sub>, 6 × CH, 1 × CH<sub>3</sub>), 1.01 (s, 3H, 1 × CH<sub>3</sub>), 0.91 (d,  $J = 5.2$  Hz, 3H, 1 × CH<sub>3</sub>), 0.87 (d,  $J = 1.8$  Hz, 3H, 1× CH<sub>3</sub>), 0.86 (d,  $J = 1.8$  Hz, 3H, 1 × CH<sub>3</sub>), 0.67 (s, 3H, 1 × CH<sub>3</sub>); <sup>13</sup>C NMR (100 MHz, CDCl<sub>3</sub>):  $\delta$  190.32,

172.78, 161.42, 160.23, 144.73, 140.07, 139.82, 130.22, 129.46, 127.57, 122.59, 120.79, 119.92, 119.41, 115.04, 113.78, 73.78, 68.27, 56.79, 56.28, 50.16, 42.40, 39.84, 39.58, 38.24, 37.08, 36.67, 36.26, 35.81, 34.70, 31.96, 31.81, 29.71, 29.34, 29.21, 29.02, 28.23, 28.03, 27.89, 26.04; MS (FAB+): m/z for C<sub>58</sub>H<sub>86</sub>O<sub>5</sub>, Calculated: 862.6, Found: 862.3; Anal. calcd for C<sub>58</sub>H<sub>86</sub>O<sub>5</sub> (found) %: C 80.69 (81); H 10.04 (9.9).

**3DC-7,9.** A colorless solid;  $R_f = 0.34$  (10%EtOAc-hexanes); yield: 0.178 g (78%); UV-Vis:  $\lambda_{\max} = 341$  nm,  $\epsilon = 2.3 \times 10^4$  L mol<sup>-1</sup>cm<sup>-1</sup>,  $\lambda_{\max} = 251.2$  nm,  $\epsilon = 2.1 \times 10^4$  L mol<sup>-1</sup>cm<sup>-1</sup>, IR (KBr Pellet)  $\nu_{\max}$  in cm<sup>-1</sup>: 2944, 2856, 1738, 1650, 1567, 1510, 1292, 1250, 1166, 1040, 830, 786 and 576; <sup>1</sup>H NMR (400 MHz, CDCl<sub>3</sub>):  $\delta$  7.77 (d,  $J = 15.8$  Hz, 1H, 1  $\times$  olefinic H), 7.58 (d,  $J = 8.6$  Hz, 2H, Ar) 7.57 (d,  $J = 15.6$  Hz, 1  $\times$  olefinic H), 7.51 (s, 1H, Ar), 7.38 (d,  $J = 8.2$  Hz, 1H, Ar), 7.36(d,  $J = 7.5$  Hz, 1H, Ar), 7.08 (dd,  $J = 2.1$  Hz, 6.6 Hz, 1H, Ar), 6.91 (d,  $J = 8.2$  Hz, 2H, Ar), 5.31(bd,  $J = 3.2$  Hz, 1H, 1  $\times$  olefinic H), 4.61(m, 1H, 1  $\times$  CHOCO), 3.97-4.03 (m, 4H, 2  $\times$  OCH<sub>2</sub>), 2.34-0.67 (m, 57H, 24  $\times$  CH<sub>2</sub>, 6  $\times$  CH, 1  $\times$  CH<sub>3</sub>), 1.01 (s, 3H, 1  $\times$  CH<sub>3</sub>), 0.88 (d,  $J = 6.6$  Hz, 3H, 1  $\times$  CH<sub>3</sub>), 0.86 (d,  $J = 1.7$  Hz, 3H, 1  $\times$  CH<sub>3</sub>), 0.84 (d,  $J = 1.6$  Hz, 3H, 1  $\times$  CH<sub>3</sub>), 0.66 (s, 3H, 1  $\times$  CH<sub>3</sub>); MS (FAB+): m/z for C<sub>59</sub>H<sub>89</sub>O<sub>5</sub>(M+1) Calculated: 877.7, Found: 877.8; Anal. calcd for C<sub>59</sub>H<sub>88</sub>O<sub>5</sub> (found) %: C 80.77 (80.8); H 10.11 (10).

**3DC-7,10.** A colorless solid;  $R_f = 0.39$  (10%EtOAc-hexanes); yield: 0.181 g (78%); UV-Vis:  $\lambda_{\max} = 343.9$  nm,  $\epsilon = 20.6 \times 10^4$  L mol<sup>-1</sup>cm<sup>-1</sup>,  $\lambda_{\max} = 249.8$  nm,  $\epsilon = 12.3 \times 10^4$  L mol<sup>-1</sup>cm<sup>-1</sup>, IR (KBr Pellet)  $\nu_{\max}$  in cm<sup>-1</sup>: 2928, 2852, 1727, 1656, 1570, 1512, 1292, 1248, 1174, 1029, 986 and 832; <sup>1</sup>H NMR (400 MHz, CDCl<sub>3</sub>):  $\delta$  7.77 (d,  $J = 15.8$  Hz, 1H, 1  $\times$  olefinic H), 7.58 (d,  $J = 8.6$  Hz, 2H, Ar) 7.57 (d,  $J = 15.5$  Hz, 1  $\times$  olefinic H), 7.51 (s, 1H, Ar), 7.4(d,  $J = 8.0$  Hz, 1H, Ar), 7.37(d,  $J = 7.4$  Hz, 1H, Ar), 7.1 (dd,  $J = 2.4$  Hz, 6.8 Hz, 1H, Ar), 6.91 (d,  $J = 8.7$  Hz, 2H, Ar), 5.36 (bd,  $J = 4.2$  Hz, 1H, 1  $\times$  olefinic H), 4.63-4.65 (m, 1H, 1  $\times$  CHOCO), 3.98-4.03 (m, 4H, 2  $\times$  OCH<sub>2</sub>), 2.28-0.67(m, 59H, 25  $\times$  CH<sub>2</sub>, 6  $\times$  CH, 1  $\times$  CH<sub>3</sub>), 1.01 (s, 3H, 1  $\times$  CH<sub>3</sub>), 0.91(d,  $J = 6.6$  Hz, 3H, 1  $\times$  CH<sub>3</sub>), 0.87 (d,  $J = 4.0$  Hz, 3H, 1  $\times$  CH<sub>3</sub>), 0.85 (d,  $J = 5.0$  Hz, 3H, 1  $\times$  CH<sub>3</sub>),

0.66 (s, 3H, 1 × CH<sub>3</sub>); MS (FAB<sup>+</sup>): m/z for C<sub>60</sub>H<sub>90</sub>O<sub>5</sub>, Calculated: 890.7, Found: 890.9; Anal. calcd for C<sub>60</sub>H<sub>90</sub>O<sub>5</sub> (found) %: C 80.85 (81.2%); H 10.18 (9.8).

**3DC-7,11.** A colorless solid; *R<sub>f</sub>* = 0.4 (10%EtOAc-hexanes); yield: 0.169 g (72%); UV-Vis: λ<sub>max</sub> = 341 nm, ε = 1.5 × 10<sup>4</sup> L mol<sup>-1</sup>cm<sup>-1</sup>, λ<sub>max</sub> = 247.1 nm, ε = 1.4 × 10<sup>4</sup> L mol<sup>-1</sup>cm<sup>-1</sup>, IR (KBr Pellet) ν<sub>max</sub> in cm<sup>-1</sup>: 2927, 2852, 1726, 1656, 1570, 1513, 1446, 1292, 1248, 1174, 1030, 986 and 832; <sup>1</sup>H NMR (400 MHz, CDCl<sub>3</sub>): δ 7.78 (d, *J* = 15.6 Hz, 1H, 1 × olefinic H), 7.59 (d, *J* = 8.6 Hz, 2H, Ar) 7.58 (d, *J* = 15.2 Hz, 1 × olefinic H), 7.52 (s, 1H, Ar), 7.39(d, *J* = 8.2 Hz, 1H, Ar), 7.38 (d, *J* = 7.5 Hz, 1H, Ar), 7.1 (dd, *J* = 2.2 Hz, 8.1 Hz, 1H, Ar), 6.92 (d, *J* = 8.7 Hz, 2H, Ar), 5.37(d, *J* = 3.6 Hz, 1H, 1 × olefinic H), 4.57-4.62 (m, 1H, 1 × CHOCO), 4.02 (t, *J* = 6.4 Hz, 2H, 1 × OCH<sub>2</sub>), 4.0 (t, *J* = 6.4 Hz, 2H, 1 × OCH<sub>2</sub>), 2.29-0.67(m, 61H, 26 × CH<sub>2</sub>, 6 × CH, 1 × CH<sub>3</sub>), 1.01 (s, 3H, 1 × CH<sub>3</sub>), 0.91(d, *J* = 6.6 Hz, 3H, 1 × CH<sub>3</sub>), 0.87 (d, *J* = 1.7 Hz, 3H, 1 × CH<sub>3</sub>), 0.85 (d, *J* = 1.6 Hz, 3H, 1 × CH<sub>3</sub>), 0.67 (s, 3H, 1 × CH<sub>3</sub>); MS (FAB<sup>+</sup>): m/z for C<sub>61</sub>H<sub>93</sub>O<sub>5</sub>(M+1) Calculated: 905.7, Found: 905.4; Anal. calcd for C<sub>61</sub>H<sub>92</sub>O<sub>5</sub> (found) %: C 80.92(80.5); H 10.24 (10).

**3DC-7,12.** A colorless solid; *R<sub>f</sub>* = 0.41 (10%EtOAc-hexanes); yield: 0.2 g (85%); UV-Vis: λ<sub>max</sub> = 345.2 nm, ε = 1.6 × 10<sup>4</sup> L mol<sup>-1</sup>cm<sup>-1</sup>, λ<sub>max</sub> = 245.8 nm, ε = 1.3 × 10<sup>4</sup> L mol<sup>-1</sup>cm<sup>-1</sup>, IR (KBr Pellet) ν<sub>max</sub> in cm<sup>-1</sup>: 2928, 2854, 1727, 1657, 1571, 1514, 1447, 1292, 1248, 1176, 1032, 988 and 834; <sup>1</sup>H NMR (400 MHz, CDCl<sub>3</sub>): δ 7.78 (d, *J* = 15.6 Hz, 1H, 1 × olefinic H), 7.59 (d, *J* = 8.6 Hz, 2H, Ar), 7.57 (d, *J* = 18.1 Hz, 1 × olefinic H), 7.51 (s, 1H, Ar), 7.41(d, *J* = 8.4 Hz, 1H, Ar), 7.38 (d, *J* = 7.2 Hz, 1H, Ar), 7.1 (dd, *J* = 2.2 Hz, 8.0 Hz, 1H, Ar), 6.92 (d, *J* = 8.7 Hz, 2H, Ar), 5.37(d, *J* = 3.6 Hz, 1H, 1 × olefinic H), 4.6-4.62 (m, 1H, 1 × CHOCO), 4.03 (t, *J* = 6.4 Hz, 2H, 1 × OCH<sub>2</sub>), 4.0 (t, *J* = 4.2 Hz, 2H, 1 × OCH<sub>2</sub>), 2.26-0.67(m, 63H, 27 × CH<sub>2</sub>, 6 × CH, 1 × CH<sub>3</sub>), 1.01 (s, 3H, 1 × CH<sub>3</sub>), 0.89(d, *J* = 8.6 Hz, 3H, 1 × CH<sub>3</sub>), 0.87 (d, *J* = 1.7 Hz, 3H, 1 × CH<sub>3</sub>), 0.85 (d, *J* = 1.7 Hz, 3H, 1 × CH<sub>3</sub>), 0.67 (s, 3H, 1 × CH<sub>3</sub>); <sup>13</sup>C NMR (100 MHz, CDCl<sub>3</sub>): δ 190.27, 173.12, 161.30, 159.38, 144.67, 139.92, 139.69, 130.15, 129.38,



127.42, 122.51, 120.70, 119.73, 119.33, 114.90, 113.6, 73.68, 68.13, 56.66, 56.13, 50.02, 42.28, 39.71, 39.47, 38.12, 36.96, 36.55, 36.14, 35.72, 34.6, 31.84, 29.5, 29.27, 29.10, 28.93, 28.15, 27.94, 27.78, 25.93, 25.80, 24.9, 24.22, 23.78, 22.71, 22.59, 22.47, 20.98, 19.24, 18.65, 15.42, 14.0, 11.78; MS (FAB+): m/z for C<sub>62</sub>H<sub>95</sub>O<sub>5</sub>(M+1) Calculated: 919.7, Found: 919.7; Anal. calcd for C<sub>62</sub>H<sub>94</sub>O<sub>5</sub> (found) %: C 80.99 (80.9); H 10.31 (10.6).

#### I.2.4. Synthesis of 3-*n*-octyloxy acetophenone (5)

This compound was prepared using a procedure analogous to that described above for the synthesis of 4-alkoxy benzaldehydes (**2a-e**). Precursors and their quantities used: *n*-octyl bromide (22.0 mmol, 1.2 equiv.), 3-hydroxy acetophenone (3 g, 21.8 mmol, 1 equiv.), anhydrous K<sub>2</sub>CO<sub>3</sub> (6.1 g, 44.1 mmol, 2 equiv.) and butanone (10 ml). A colorless liquid; *R<sub>f</sub>* = 0.66 (20% EtOAc-hexanes); yield: 4.33 g (80 %); IR (KBr Pellet)  $\nu_{\max}$  in cm<sup>-1</sup>: 3018, 2929, 2857, 1654, 1576, 1441, 1336, 1256, 1169, 831 and 758; <sup>1</sup>H NMR (200 MHz, CDCl<sub>3</sub>):  $\delta$  7.9 (d, *J* = 8.3 Hz, 2H, 2 × Ar), 7.02 (d, *J* = 8.2 Hz, 2H, Ar), 4.02 (t, *J* = 6.4 Hz, 2H, 1 × OCH<sub>2</sub>), 2.5 (s, 3H, 1 × COCH<sub>3</sub>), 1.80-0.86 (m, 15H, 6 × CH<sub>2</sub>, 1 × CH<sub>3</sub>); MS (FAB+): m/z for C<sub>16</sub>H<sub>25</sub>O<sub>2</sub>(M+1) Calculated: 249.2, Found: 249.2.

#### I.2.5. Synthesis of hydroxy chalcone 6

Compound **6** was synthesized using a synthetic procedure similar to that described above for the preparation of chalcones (**3a-e**). Precursors and their quantities used: 4-hydroxy benzaldehyde (1.48 g, 12.1 mmol, 1equiv.), 3-*n*-octyloxy acetophenone (**5**) (3 g, 12.1 mmol, 1equiv.) and KOH (2.44 g, 43.5 mmol, 3.6 equiv.) and methanol (20 ml). Column chromatography: silica gel (60-120 mesh) and 10% ethylacetate-hexanes as eluent. A yellow solid; *R<sub>f</sub>* = 0.25 (2:8 EtOAc-hexanes); yield: 3.33 g, 78 %; m.p.: 74°C ; IR (KBr Pellet)  $\nu_{\max}$  in cm<sup>-1</sup>: 3338, 2929, 2857, 1654, 1576,

1514, 1441, 1336, 1296, 1256, 1169, 831, 758 and 668;  $^1\text{H}$  NMR (200 MHz,  $\text{CDCl}_3$ ):  $\delta$  7.8 (d,  $J = 15.6$  Hz, 1H, 1  $\times$  olefinic H), 7.57 (d,  $J = 8.6$  Hz, 4H, Ar), 7.39 (t,  $J = 7.6$  Hz, 15.8 Hz, 2H, 1  $\times$  olefinic H, Ar), 7.12 (d,  $J = 7.8$  Hz, 1H, Ar), 6.88 (d,  $J = 8.4$  Hz, 2H, Ar), 5.16 (s, 1H, 1  $\times$  OH), 3.95-4.1 (t,  $J = 6.4$  Hz, 2H, 1  $\times$   $\text{OCH}_2$ ), 1.85-0.86 (m, 15H, 6  $\times$   $\text{CH}_2$ , 1  $\times$   $\text{CH}_3$ ); MS (FAB+):  $m/z$  for  $\text{C}_{23}\text{H}_{29}\text{O}_3(\text{M}+1)$  Calculated: 353.2, Found: 353.2; Anal. calcd for  $\text{C}_{23}\text{H}_{28}\text{O}_3$ : C, 78.38; H, 8.01. Found: C, 78.5; H, 8.4.

### 1.2.6. Synthesis of dimers of series-2 (3RDC-n,m)

These dimers were prepared and purified in a similar way to that described above for compounds of series-1 (see section 2.3B). Precursors and their quantities used: cholesteryl  $\omega$ -bromoalkanoate (**1a-d**) (0.26 mmol, 1equiv.), hydroxy chalcone **6** (0.092 g, 0.26 mmol, 1equiv.), anhydrous  $\text{K}_2\text{CO}_3$  (0.072 g, 0.52 mmol, 4 equiv.) and dry DMF (5-6 ml).

**3RDC-3,8**: A colorless solid;  $R_f = 0.48$  (20% EtOAc-hexanes); yield: 0.167 g, (80%); UV-Vis:  $\lambda_{\text{max}} = 338.3$  nm,  $\epsilon = 1.5 \times 10^4 \text{ L mol}^{-1}\text{cm}^{-1}$ ,  $\lambda_{\text{max}} = 246.8$  nm,  $\epsilon = 1.5 \times 10^4 \text{ L mol}^{-1}\text{cm}^{-1}$ , IR (KBr Pellet)  $\nu_{\text{max}}$  in  $\text{cm}^{-1}$ : 2934, 2868, 1728, 1660, 1588, 1512, 1468, 1252, 1177, 1027, 984 and 827;  $^1\text{H}$  NMR (400 MHz,  $\text{CDCl}_3$ ):  $\delta$  7.78 (d,  $J = 15.6$  Hz, 1H, 1  $\times$  olefinic H), 7.59 (d,  $J = 8.6$  Hz, 2H, Ar), 7.57 (d,  $J = 15.6$  Hz, 1  $\times$  olefinic H), 7.52 (s, 1H, Ar), 7.4 (d,  $J = 8.3$  Hz, 1H, Ar), 7.35 (d,  $J = 7.3$  Hz, 1H, Ar), 7.1 (dd,  $J = 2.4$  Hz, 5.8 Hz, 1H, Ar), 6.92 (d,  $J = 8.7$  Hz, 2H, Ar), 5.36 (bd,  $J = 3.6$  Hz, 1H, 1  $\times$  olefinic H), 4.6-4.64 (m, 1H, 1  $\times$   $\text{CHOCO}$ ), 3.99-4.1 (m, 4H, 2  $\times$   $\text{OCH}_2$ ), 2.5-0.67 (m, 50H, 19  $\times$   $\text{CH}_2$ , 6  $\times$  CH, 2  $\times$   $\text{CH}_3$ ), 1.01 (s, 3H, 1  $\times$   $\text{CH}_3$ ), 0.87 (d,  $J = 1.6$  Hz, 3H, 1  $\times$   $\text{CH}_3$ ), 0.85 (d,  $J = 1.7$  Hz, 3H, 1  $\times$   $\text{CH}_3$ ), 0.67 (s, 3H, 1  $\times$   $\text{CH}_3$ ); MS (FAB+):  $m/z$  for  $\text{C}_{54}\text{H}_{79}\text{O}_5(\text{M}+1)$  Calculated: 807.6, Found: 807.2; Anal. calcd for  $\text{C}_{54}\text{H}_{78}\text{O}_5$  (found) %: C 80.35 (80.6); H 9.74 (9.7).

**3RDC-4,8:** A colorless solid;  $R_f = 0.48$  (20% EtOAc-hexanes); yield: 0.169 g (79%); UV-Vis:  $\lambda_{\max} = 339$  nm,  $\epsilon = 1.7 \times 10^4$  L mol<sup>-1</sup>cm<sup>-1</sup>,  $\lambda_{\max} = 250$  nm,  $\epsilon = 1.6 \times 10^4$  L mol<sup>-1</sup>cm<sup>-1</sup>, IR (KBr Pellet)  $\nu_{\max}$  in cm<sup>-1</sup>: 2936, 2869, 1730, 1662, 1590, 1512, 1470, 1254, 1178, 1027, 984 and 830; <sup>1</sup>H NMR (400 MHz, CDCl<sub>3</sub>):  $\delta$  7.8 (d,  $J = 15.6$  Hz, 1H, 1  $\times$  olefinic H), 7.58 (d,  $J = 8.7$ Hz, 2H, Ar) 7.57 (d,  $J = 15.3$  Hz, 1  $\times$  olefinic H), 7.52 (s, 1H, Ar), 7.39 (d,  $J = 8.2$  Hz, 1H, Ar), 7.37 (d,  $J = 7.4$  Hz, 1H, Ar), 7.1 (dd,  $J = 1.8$  Hz, 6.4 Hz, 1H, Ar), 6.91 (d,  $J = 8.8$  Hz, 2H, Ar), 5.37 (bd,  $J = 4.1$  Hz, 1H, 1  $\times$  olefinic H), 4.6-4.64 (m, 1H, 1  $\times$  CHOCO), 4-4.1 (m, 4H, 2  $\times$  OCH<sub>2</sub>), 2.37-0.67 (m, 49H, 20  $\times$  CH<sub>2</sub>, 6  $\times$  CH, 1  $\times$  CH<sub>3</sub>), 1.02 (s, 3H, 1  $\times$  CH<sub>3</sub>), 0.91 (d,  $J = 6.4$  Hz, 3H, 1  $\times$  CH<sub>3</sub>), 0.87 (d,  $J = 1.6$  Hz, 3H, 1  $\times$  CH<sub>3</sub>), 0.86 (d,  $J = 1.7$  Hz, 3H, 1  $\times$  CH<sub>3</sub>), 0.67 (s, 3H, 1  $\times$  CH<sub>3</sub>); MS (FAB+): m/z for C<sub>55</sub>H<sub>81</sub>O<sub>5</sub>(M+1) Calculated: 821.6, Found: 821.5; Anal.calcd for C<sub>55</sub>H<sub>80</sub>O<sub>5</sub> (found) %:C 80.44 (80.4); H 9.82 (9.9).

**3RDC-5,8:** A colorless solid;  $R_f = 0.48$  (20% EtOAc-hexanes); yield: 0.174 g (80%); UV-Vis:  $\lambda_{\max} = 341$  nm,  $\epsilon = 1.4 \times 10^4$  L mol<sup>-1</sup>cm<sup>-1</sup>,  $\lambda_{\max} = 249.2$  nm,  $\epsilon = 3.7 \times 10^4$  L mol<sup>-1</sup>cm<sup>-1</sup>, IR (KBr Pellet)  $\nu_{\max}$  in cm<sup>-1</sup>: 2936, 2867, 1727, 1657, 1582, 1511, 1472, 1258, 1175, 1028, 824 and 793; <sup>1</sup>H NMR (400 MHz, CDCl<sub>3</sub>):  $\delta$  7.8 (d,  $J = 12.6$  Hz, 1H, 1  $\times$  olefinic H), 7.58 (d,  $J = 8.7$  Hz, 2H, Ar) 7.57 (d,  $J = 15.3$  Hz, 1  $\times$  olefinic H), 7.52 (s, 1H, Ar), 7.39(d,  $J = 6.2$  Hz, 1H, Ar), 7.37(d,  $J = 6.4$  Hz, 1H, Ar), 7.1 (dd,  $J = 1.8$ Hz, 6.5 Hz, 1H, Ar), 6.9 (d,  $J = 7.0$  Hz, 2H, Ar), 5.37 (bd,  $J = 4.2$  Hz, 1H, 1  $\times$  olefinic H), 4.63 (m, 1H, 1  $\times$  CHOCO), 4-4.04 (m, 4H, 2  $\times$  OCH<sub>2</sub>), 2.34-0.67 (m, 48H, 21  $\times$  CH<sub>2</sub>, 6  $\times$  CH), 1.01 (s, 3H, 1  $\times$  CH<sub>3</sub>), 0.96 (d,  $J = 4.2$  Hz, 3H, 1  $\times$  CH<sub>3</sub>), 0.94 (d,  $J = 4.3$  Hz, 3H, 1  $\times$  CH<sub>3</sub>), 0.87 (d,  $J = 1.8$  Hz, 3H, 1  $\times$  CH<sub>3</sub>), 0.86 (d,  $J = 1.7$  Hz, 3H, 1  $\times$  CH<sub>3</sub>), 0.67 (s, 3H, 1  $\times$  CH<sub>3</sub>); MS (FAB+): m/z for C<sub>56</sub>H<sub>83</sub>O<sub>5</sub>(M+1) Calculated: 835.6, Found: 835.7; Anal.calcd for C<sub>56</sub>H<sub>82</sub>O<sub>5</sub> (found) %: C 80.53 (80.3); H 9.90 (10).

**3RDC-7,8:** A colorless solid  $R_f = 0.52$  (20% EtOAc-hexanes ); yield: 0.180 g (80%); UV-Vis:  $\lambda_{\max} = 341.8$  nm,  $\epsilon = 1.7 \times 10^4$  L mol<sup>-1</sup>cm<sup>-1</sup>,  $\lambda_{\max} = 249$  nm,  $\epsilon = 1.4 \times 10^4$  L mol<sup>-1</sup>cm<sup>-1</sup>, IR (KBr Pellet)  $\nu_{\max}$  in cm<sup>-1</sup>: 2931, 2853, 1729, 1653, 1580, 1514, 1470,

1440, 1262, 1174, 1018, 822 and 740;  $^1\text{H}$  NMR (400 MHz,  $\text{CDCl}_3$ ):  $\delta$  7.8 (d,  $J = 15.6$  Hz, 1H, 1  $\times$  olefinic H), 7.59 (d,  $J = 8.6$  Hz, 2H, Ar), 7.57 (d,  $J = 15.0$  Hz, 1  $\times$  olefinic H), 7.52 (s, 1H, Ar), 7.4 (d,  $J = 8.2$  Hz, 1H, Ar), 7.38 (d,  $J = 7.4$  Hz, 1H, Ar), 7.12 (dd,  $J = 2$  Hz, 6.8 Hz, 1H, Ar), 6.9 (d,  $J = 8.7$  Hz, 2H, Ar), 5.36 (bd,  $J = 3.6$  Hz, 1H, 1  $\times$  olefinic H), 4.57- 4.63 (m, 1H, 1  $\times$  CHOCO), 4.03 (t,  $J = 6.6$  Hz, 2H, 1  $\times$   $\text{OCH}_2$ ), 3.99 (t,  $J = 6.6$  Hz, 2H, 1  $\times$   $\text{OCH}_2$ ), 2.34-0.67(m, 55H, 23  $\times$   $\text{CH}_2$ , 6  $\times$  CH, 1  $\times$   $\text{CH}_3$ ), 1.01 (s, 3H, 1  $\times$   $\text{CH}_3$ ), 0.90 (d,  $J = 6.5$  Hz, 3H, 1  $\times$   $\text{CH}_3$ ), 0.87 (d,  $J = 1.7$  Hz, 3H, 1  $\times$   $\text{CH}_3$ ), 0.85 (d,  $J = 1.7$  Hz, 3H, 1  $\times$   $\text{CH}_3$ ), 0.67 (s, 3H, 1  $\times$   $\text{CH}_3$ );  $^{13}\text{C}$  NMR (100 MHz,  $\text{CDCl}_3$ ):  $\delta$  190.29, 173.10, 161.25, 159.42, 144.65, 139.91, 139.67, 130.15, 129.37, 127.46, 122.54, 120.67, 119.76, 119.35, 114.89, 113.61, 73.69, 68.25, 68.06, 56.66, 56.13, 50.02, 42.28, 39.70, 39.47, 38.13, 36.96, 36.56, 36.14, 35.72, 34.57, 31.84, 31.74, 29.27, 29.17, 29.01, 28.90, 28.14, 27.94, 27.78, 25.98, 25.75, 24.87, 24.22, 23.78, 22.72, 22.57, 22.47, 20.98, 19.24, 18.65, 13.98, 11.78; MS(FAB+): m/z for  $\text{C}_{58}\text{H}_{86}\text{O}_5$ , Calculated: 862.6, Found: 862.1; Anal.calcd for  $\text{C}_{58}\text{H}_{86}\text{O}_5$  (found) %:C 80.69 (80.4); H 10.04 (9.9).

### I.2.7. Synthesis of 4-bromo-4'-(*n*-octyloxy)biphenyl (7):

This compound was prepared using a procedure similar to that described for the synthesis of aldehyde **5**. Precursors and their quantities used: *n*-octylbromide (0.77 g, 4.0 mmol, 1.2 equiv.), 4-bromo-4'-hydroxy biphenyl (1 g, 4.0 mmol, 1equiv.), anhydrous  $\text{K}_2\text{CO}_3$  (1.1 g, 8.0 mmol, 2 equiv.) and butanone. Column chromatography: silica gel (100-200 mesh) and 10% EtOAc-hexanes as an eluent. A colorless solid;  $R_f = 0.8$  (10% EtOAc-hexanes); yield: 1.34 g, 85%; m.p.: 125  $^\circ\text{C}$  IR (KBr Pellet)  $\nu_{\text{max}}$  in  $\text{cm}^{-1}$ : 3419, 2920, 2853, 1605, 1523, 1474, 1288, 1253, 1198, 996, 812 and 789;  $^1\text{H}$  NMR (200 MHz,  $\text{CDCl}_3$ ):  $\delta$  7.53 (d,  $J = 8.4$  Hz, 2H, Ar), 7.47 (d,  $J = 9.0$  Hz, 2H, Ar), 7.44 (d,  $J = 8.6$  Hz, 2H, Ar), 6.96 (d,  $J = 8.6$  Hz, 2H, Ar), 3.99 (t,  $J = 6.6$  Hz, 2H, 1  $\times$   $\text{OCH}_2$ ), 1.84-0.86 (m, 15H, 6  $\times$   $\text{CH}_2$ , 1  $\times$   $\text{CH}_3$ ); MS (FAB+): m/z for  $\text{C}_{20}\text{H}_{25}\text{BrO}_3$  Calculated: 392.1, Found: 392.1.

### I.2.8. Synthesis of 4-formyl-4'-(*n*-octyloxy)biphenyl (**8**):

To a solution of compound **7** (4.33 g, 11 mmol, 1equiv.) in dry THF (15 ml) at -78 °C was added drop wise a 1.6 M solution of *n*-butyllithium (13 mmol, 1.2 equiv) in hexanes under an inert atmosphere. After stirring for 2.5 h, a solution of dry DMF (1.3 ml, 17 mmol, 1.5 equiv) in dry THF was added drop wise at -78 °C. The reaction mixture was allowed to warm up to room temperature and continued to stir for 12 h. The reaction mixture was acidified with cold 1N HCl (30 ml) and stirred for 1 h. The crude product was extracted into ethyl acetate (2 × 50 ml) and the combined organic extracts were washed with water (2 × 100 ml) and dried over anhydrous Na<sub>2</sub>SO<sub>4</sub>. Solvent was then removed *in vacuo* and the crude material was purified by column chromatography on silica gel (60-120) using 30% CH<sub>2</sub>Cl<sub>2</sub>-hexanes as an eluent. A colourless solid;  $R_f = 0.57$  (5% EtOAc-CH<sub>2</sub>Cl<sub>2</sub>); yield: 2.39 g (70%); m.p. 155 °C IR (KBr Pellet)  $\nu_{\max}$  in cm<sup>-1</sup>: 2955, 2922, 2855, 2364, 1601, 1477, 1293, 1253, 1185, 1122, 1029, 847 and 774; <sup>1</sup>H NMR (200 MHz, CDCl<sub>3</sub>):  $\delta$  10.0 (s, 1H, CHO), 7.92 (d,  $J = 8.3$  Hz, 2H, Ar), 7.72 (d,  $J = 8.2$  Hz, 2H, Ar), 7.58 (d,  $J = 8.0$  Hz, 2H, Ar), 7.0 (d,  $J = 8.8$  Hz, 2H, Ar), 4.01 (t,  $J = 6.6$  Hz, 2H, 1 × OCH<sub>2</sub>), 1.85-0.88 (m, 15H, 6 × CH<sub>2</sub>, 1 × CH<sub>3</sub>); MS (FAB+): m/z for C<sub>21</sub>H<sub>27</sub>O<sub>2</sub>(M+1) Calculated: 311.2, Found: 311.2.

### I.2.9. Synthesis of hydroxy chalcone **9**

Compound **9** was prepared by a procedure as described for the synthesis of chalcones **3a-e**. Precursors and their quantities used: 4-formyl-4'-(*n*-octyloxy)biphenyl (**8**) (0.372 g, 1.2 mmol, 1.0 equiv.), 3-hydroxy acetophenone (0.163 g, 1.2 mmol, 1 equiv.), KOH (0.236 g, 4.2 mmol, 3.6 equiv.) and methanol (25 ml). Column chromatography: silica gel (60-120) and 15% ethylacetate-hexanes as eluent. A yellow solid;  $R_f = 0.4$  (5% EtOAc-CH<sub>2</sub>Cl<sub>2</sub>); yield: 0.37 g (72%); m.p.: 91 °C ; IR (KBr Pellet)  $\nu_{\max}$  in cm<sup>-1</sup>: 3345, 2929, 2400, 1676, 1598, 1586, 1450, 1287, 1252, 1184, 884 and 669; <sup>1</sup>H NMR (200 MHz, CDCl<sub>3</sub>):  $\delta$  7.85 (d,  $J = 15.6$  Hz, 1H, 1 × olefinic H), 7.7

(d,  $J = 8.4$  Hz, 2H, Ar), 7.6 (d,  $J = 9.2$  Hz, 2H, Ar), 7.48-7.72(m, 4H, Ar), 7.4 (t, 2H,  $J = 15.6$  Hz, 8.0 Hz, 1  $\times$  olefinic H, 1  $\times$  Ar), 7.09 (d,  $J = 7.1$  Hz, 1H, Ar), 7.0 (d,  $J = 8.6$  Hz, 2H, Ar), 5.3(s, 1H, 1  $\times$  OH), 4.01 (t,  $J = 6.4$  Hz, 2H, 1  $\times$  OCH<sub>2</sub>), 1.85-0.86 (m, 15 H, 6  $\times$  CH<sub>2</sub>, 1  $\times$  CH<sub>3</sub>); MS (FAB+):  $m/z$  for C<sub>29</sub>H<sub>33</sub>O<sub>3</sub>(M+1) Calculated: 429.2, Found: 429.2.

### 1.2.10. Synthesis of dimers of series-3 (3BDC-n,m series)

These target compounds were synthesized and purified in an analogous way to that described above for dimers of series-1 (see section 2.3B). Precursors and their quantities used: cholesteryl  $\omega$ -bromoalkanoate (**1a-d**) (0.26 mmol, 1equiv.), hydroxy chalcone **9** (0.111 g, 0.26 mmol, 1equiv.), anhydrous K<sub>2</sub>CO<sub>3</sub> (0.072 g, 0.52 mmol, 4 equiv.) and dry DMF (5-6 ml).

**3BDC-3,8**: A yellow solid;  $R_f = 0.33$  (20% EtOAc-hexanes); yield: 0.179 g (78%); UV-Vis:  $\lambda_{\max} = 349.6$  nm,  $\epsilon = 1.8 \times 10^4$  L mol<sup>-1</sup>cm<sup>-1</sup>,  $\lambda_{\max} = 268.9$  nm,  $\epsilon = 1.7 \times 10^4$  L mol<sup>-1</sup>cm<sup>-1</sup>, IR (KBr Pellet)  $\nu_{\max}$  in cm<sup>-1</sup>: 2933, 2868, 2852, 1712, 1585, 1574, 1498, 1467, 1254, 1193, 1172, 1042 and 822; <sup>1</sup>H NMR (400 MHz, CDCl<sub>3</sub>):  $\delta$  7.84 (d,  $J = 15.6$  Hz, 1H, 1  $\times$  olefinic H), 7.7 (d,  $J = 8.2$  Hz, 2H, Ar) 7.61 (d,  $J = 8.1$ Hz, 2H, Ar), 7.56 (d,  $J = 6.7$  Hz, 4H, Ar), 7.53 (d,  $J = 13.6$  Hz, 1H, 1  $\times$  olefinic H), 7.41(t,  $J = 8.0$  Hz, 1H, Ar), 7.12 (dd,  $J = 2.4$  Hz, 6.1 Hz, 1H, Ar), 6.98 (d,  $J = 8.6$  Hz, 2H, Ar), 5.36 (bd,  $J = 4.2$  Hz, 1H, 1  $\times$  olefinic H), 4.63-4.65 (m, 1H, 1  $\times$  CHOCO), 4.1 (t,  $J = 6.0$  Hz, 2H, 1  $\times$  OCH<sub>2</sub>), 4.0 (t,  $J = 6.5$  Hz, 2H, 1  $\times$  OCH<sub>2</sub>), 2.52-0.67(m, 50H, 19  $\times$  CH<sub>2</sub>, 6  $\times$  CH, 2  $\times$  CH<sub>3</sub>), 1.01 (s, 3H, 1  $\times$  CH<sub>3</sub>), 0.87 (d,  $J = 1.4$  Hz, 3H, 1  $\times$  CH<sub>3</sub>), 0.86 (d,  $J = 1.4$  Hz, 3H, 1  $\times$  CH<sub>3</sub>), 0.66 (s, 3H, 1  $\times$  CH<sub>3</sub>); <sup>13</sup>C NMR (100 MHz, CDCl<sub>3</sub>):  $\delta$  190.13, 172.46, 159.14, 144.51, 142.99, 139.58, 133.16, 132.31, 129.54, 128.96, 128.01, 126.96, 122.63, 121.55, 121.0, 119.48, 114.94, 113.72, 74.09, 68.14, 67.07, 56.63, 56.13, 49.99, 42.27, 39.69, 39.47, 38.11, 36.94, 36.54, 36.15, 35.72, 31.81, 31.07, 29.22, 28.15, 27.94, 27.94, 27.77, 25.99, 24.61, 24.21, 23.79, 22.72, 22.48,

20.97, 19.23, 18.66, 13.99, 11.78; MS (FAB+):  $m/z$  for  $C_{60}H_{83}O_5(M+1)$  Calculated: 883.6, Found: 883.6; Anal.calcd for  $C_{60}H_{82}O_5$  (found) %: C 81.59 (81.5); H 9.36 (9.4).

**3BDC-4,8:** A yellow solid;  $R_f = 0.33$  (20% EtOAc-hexanes); yield: 0.179 g (77%); UV-Vis:  $\lambda_{max} = 347.9$  nm,  $\epsilon = 1.6 \times 10^4$  L mol<sup>-1</sup>cm<sup>-1</sup>,  $\lambda_{max} = 269$  nm,  $\epsilon = 1.6 \times 10^4$  L mol<sup>-1</sup>cm<sup>-1</sup>, IR (KBr Pellet)  $\nu_{max}$  in cm<sup>-1</sup>: 2932, 2868, 2852, 1732, 1574, 1499, 1286, 1253, 1169, 779 and 653; <sup>1</sup>H NMR (400 MHz, CDCl<sub>3</sub>):  $\delta$  7.84 (d,  $J = 15.8$  Hz, 1H, 1  $\times$  olefinic H), 7.7 (d,  $J = 8.3$  Hz, 2H, Ar) 7.61 (d,  $J = 8.3$  Hz, 2H, Ar), 7.55 (d,  $J = 8.3$  Hz, 4H, Ar), 7.53 (d,  $J = 13.6$  Hz, 1H, 1 $\times$ olefinic H) , 7.41(t,  $J = 8.0$  Hz, 1H, Ar) , 7.12 (dd,  $J = 2.3$  Hz, 8.4 Hz, 1H, Ar), 6.98 (d,  $J = 8.7$  Hz, 2H, Ar), 5.36 (bd,  $J = 4.2$  Hz, 1H, 1  $\times$  olefinic H), 4.61-4.63 (m, 1H, 1  $\times$  CHOCO), 3.97-4.02 (m, 4H, 2  $\times$  OCH<sub>2</sub>), 2.32-0.67(m, 52H, 20 $\times$  CH<sub>2</sub>, 6  $\times$  CH, 2 $\times$  CH<sub>3</sub>), 1.01 (s, 3H, 1  $\times$  CH<sub>3</sub>), 0.87 (d,  $J = 1.6$  Hz, 3H, 1 $\times$  CH<sub>3</sub>), 0.85 (d,  $J = 1.6$  Hz, 3H, 1 $\times$  CH<sub>3</sub>), 0.66 (s, 3H, 1 $\times$  CH<sub>3</sub>); MS (FAB+):  $m/z$  for  $C_{61}H_{85}O_5(M+1)$  Calculated: 897.6, Found: 897.9; Anal.calcd for  $C_{61}H_{84}O_5$  (found) %: C 81.65 (81.3); H 9.44 (9.5).

**3BDC-5,8:** A yellow solid;  $R_f = 0.34$  (20% EtOAc-hexanes); yield: 0.175 g (74%); UV-Vis:  $\lambda_{max} = 349.8$  nm,  $\epsilon = 2.2 \times 10^4$  L mol<sup>-1</sup>cm<sup>-1</sup>,  $\lambda_{max} = 267.4$  nm,  $\epsilon = 2.2 \times 10^4$  L mol<sup>-1</sup>cm<sup>-1</sup>, IR (KBr Pellet)  $\nu_{max}$  in cm<sup>-1</sup>: 2935, 2867, 1734, 1589, 1576, 1498, 1250, 1174, 785 and 653; <sup>1</sup>H NMR (400 MHz, CDCl<sub>3</sub>):  $\delta$  7.84 (d,  $J = 15.5$  Hz, 1H, 1  $\times$  olefinic H), 7.69 (d,  $J = 8.2$  Hz, 2H, Ar) 7.61 (d,  $J = 8.1$ Hz, 2H, Ar) , 7.56 (d,  $J = 8.7$  Hz, 4H, Ar), 7.53 (d, 1H,  $J = 15.6$  Hz, 1H, 1 $\times$  olefinic H) , 7.41(t,  $J = 7.9$  Hz, 1H, Ar), 7.11 (dd,  $J = 2.1$  Hz, 6.2 Hz, 1H, Ar), 6.98 (d,  $J = 8.6$  Hz, 2H, Ar), 5.36 (bd,  $J = 4.2$  Hz, 1H, 1  $\times$  olefinic H), 4.63 (m, 1H, 1  $\times$  CHOCO), 3.97-4.1 (m, 4H, 2  $\times$  OCH<sub>2</sub>), 2.34-0.67 (m, 51H, 21  $\times$  CH<sub>2</sub>, 6  $\times$  CH, 1 $\times$  CH<sub>3</sub>), 1.01 (s, 3H, 1  $\times$  CH<sub>3</sub>), 0.89 (d,  $J = 5.9$  Hz, 3H, 1 $\times$  CH<sub>3</sub>), 0.87 (d,  $J = 1.5$  Hz, 3H, 1 $\times$  CH<sub>3</sub>), 0.86 (d,  $J = 1.52$  Hz, 3H, 1 $\times$  CH<sub>3</sub>), 0.67 (s, 3H, 1  $\times$  CH<sub>3</sub>); MS (FAB+):  $m/z$  for  $C_{62}H_{87}O_5(M+1)$  Calculated: 911.7, Found: 911.4; Anal.calcd for  $C_{62}H_{86}O_5$  (found) %: C 81.71 (81.6); H 9.51 (9.8).

**3BDC-7,8:** A yellow solid;  $R_f = 0.34$  (20% EtOAc-hexanes); yield: 0.182 g (75%); UV-Vis:  $\lambda_{\max} = 345$  nm,  $\epsilon = 1.3 \times 10^4$  L mol<sup>-1</sup>cm<sup>-1</sup>,  $\lambda_{\max} = 268.5$  nm,  $\epsilon = 1.3 \times 10^4$  L mol<sup>-1</sup>cm<sup>-1</sup>, IR (KBr Pellet)  $\nu_{\max}$  in cm<sup>-1</sup>: 2932, 2868, 1732, 1589, 1574, 1499, 1253, 1190, 779 and 654; <sup>1</sup>H NMR (400 MHz, CDCl<sub>3</sub>):  $\delta$  7.84 (d,  $J = 15.6$  Hz, 1H, 1  $\times$  olefinic H), 7.7 (d,  $J = 8.3$  Hz, 2H, Ar), 7.62 (d,  $J = 8.1$  Hz, 2H, Ar), 7.55-7.59 (m, 6H, Ar), 7.49 (d, 1H,  $J = 13.2$  Hz, 1H, 1 $\times$ olefinic H), 7.41(t,  $J = 7.9$  Hz, 1H, Ar), 7.12 (dd,  $J = 1.9$  Hz, 7.8 Hz, 1H, Ar), 6.99 (d,  $J = 8.7$  Hz, 2H, Ar), 5.37(bd,  $J = 4.2$  Hz, 1H, 1  $\times$  olefinic H), 4.57-4.63 (m, 1H, 1  $\times$  CHOCO), 3.97-4.1 (m, 4H, 2  $\times$  OCH<sub>2</sub>), 2.32-0.67(m, 56 H, 22  $\times$  CH<sub>2</sub>, 6  $\times$  CH, 2  $\times$  CH<sub>3</sub>), 1.01 (s, 3H, 1  $\times$  CH<sub>3</sub>), 0.87 (d,  $J = 1.8$  Hz, 3H, 1 $\times$  CH<sub>3</sub>), 0.86 (d,  $J = 1.7$  Hz, 3H, 1  $\times$ CH<sub>3</sub>), 0.67 (s, 3H, 1  $\times$  CH<sub>3</sub>); MS (FAB+):  $m/z$  for C<sub>64</sub>H<sub>91</sub>O<sub>5</sub>(M+1) Calculated: 939.7, Found: 939.7; Anal.calcd for C<sub>64</sub>H<sub>90</sub>O<sub>5</sub> (found) %: C 81.83 (81.8); H 9.66 (9.5).

### 1.2.11. Synthesis of 1,2-difluoro-3-(*n*-octyloxy) benzene (10)

This compound was synthesized in a similar way to that described for the preparation of 4-alkoxy benzaldehydes (**2a-e**). Precursors and their quantities used: *n*-octylbromide (3 g, 15.4 mmol, 1.2 equiv.), 1,2-difluoro-3-hydroxy benzene, (2 g, 15.4 mmol, 1 equiv.), anhydrous K<sub>2</sub>CO<sub>3</sub> (4.24 g, 30.7 mmol, 2 equiv.) and butanone (15 ml). Column chromatography: silica gel (60-120 mesh) and 5% ethylacetate-hexanes as the eluent. A colorless liquid;  $R_f = 0.44$  (10% CH<sub>2</sub>Cl<sub>2</sub>-hexanes); yield: 3.47 g (93%); IR (Neat)  $\nu_{\max}$  in cm<sup>-1</sup> 3435, 3046, 2928, 2857, 1619, and 1597; <sup>1</sup>H NMR (200 MHz, CDCl<sub>3</sub>):  $\delta$  6.94 (m, 1H, Ar), 6.71 (m, 2H, Ar), 4.02 (t,  $J = 6.6$  Hz, 2H, 1  $\times$  OCH<sub>2</sub>), 1.81 (m, 2H, 1  $\times$  CH<sub>2</sub>), 1.4-1.2 (m, 10H, 5  $\times$  CH<sub>2</sub>) and 0.88 (t,  $J = 6.5$  Hz, 3H, 1  $\times$  CH<sub>3</sub>); MS (FAB+):  $m/z$  for C<sub>14</sub>H<sub>20</sub>F<sub>2</sub>O, Calculated: 242.2, Found: 242.4.

### 1.2.12. Synthesis of 2,3-difluoro-4-(*n*-octyloxy)phenylboronic acid (11)



*n*-Butyllithium (1.6 M solution in hexanes; 13 mmol, 1.2 equiv.) was added dropwise to a solution of **10** (2.67 g, 11 mmol, 1equiv.) in dry THF (15ml) at -78 °C under dry nitrogen atmosphere. The reaction mixture was stirred at this temperature for 2.5 h before a previously cooled (-5 °C) solution of tri-isopropyl borate (3.2 g, 17 mmol, 1.5 equiv) in dry THF was added drop wise to the reaction flask at -78 °C. The reaction mixture was allowed to warm to room temperature overnight and stirred with 10 % aqueous HCl (30 ml) for 1 h. The crude product was extracted into ether (2 × 50 ml) and the combined organic extracts were washed with water (2 × 100 ml) and dried over anhydrous Na<sub>2</sub>SO<sub>4</sub>. The crude product obtained after evaporating solvent *in vacuo* was recrystallized twice from CH<sub>2</sub>Cl<sub>2</sub>. A colourless solid; *R<sub>f</sub>* = 0.42 (50% EtOAc-hexanes); yield: 2.7 g (88 %); IR (KBr pellet)  $\nu_{\max}$  in cm<sup>-1</sup>: 3337, 2927, 2857, 1627, 1573 and 1520; <sup>1</sup>H NMR (200 MHz, CDCl<sub>3</sub>):  $\delta$  7.48 (m, 1H, Ar), 6.77 (m, 1H, Ar), 4.92 (brs, 2H, 2 × OH), 4.07 (t, *J* = 6.58 Hz, 2H, 1 × OCH<sub>2</sub>), 1.79 (m, 2H, 1 × CH<sub>2</sub>), 1.5-1.3 (m, 10H, 5 × CH<sub>2</sub>) and 0.88 (t, *J* = 6.54 Hz, 3H, 1 × CH<sub>3</sub>).MS (FAB+): *m/z* for C<sub>14</sub>H<sub>22</sub>BO<sub>3</sub>F<sub>2</sub> (M+1), Calculated: 287.2. Found: 287.1.

### **1.2.13. Synthesis of 2',3'-difluoro-4'-(*n*-octyloxy)biphenyl-4-carbaldehyde (**12**)**

Boronic acid (**11**) (1 g, 3.5 mmol, 1.05 equiv.), 4-bromo benzaldehyde (0.61 g, 3.3 mmol, 1 equiv.), 2M Na<sub>2</sub>CO<sub>3</sub> (aq) solution (4 ml), benzene (10 ml) and ethanol (10 ml) were taken in a 100 ml single necked RBF and degassed for 15 minutes by purging nitrogen. After adding tetrakis-(triphenyl phosphine) palladium (0) the reaction mixture was heated under reflux for 12 h. The reaction mixture was allowed to attain room temperature and was poured into cold water (50 ml). The mixture was extracted with ethyl acetate (2 × 50 ml) and the combined organic extracts were washed with brine (2 × 50 ml) and dried over anhydrous Na<sub>2</sub>SO<sub>4</sub>. The solvent was removed *in vacuo* and the crude product obtained was purified by column chromatography using silica gel (100-200 mesh), and 8% EtOAc-hexanes and 15% EtOAc-hexanes as eluents. The product was further purified by repeated recrystallization with hexanes. A colorless solid; *R<sub>f</sub>* = 0.68 (7:3 CH<sub>2</sub>Cl<sub>2</sub>-EtOAc);

yield: 0.849 g (70%); m.p.: 78 °C. IR (KBr Pellet)  $\nu_{\max}$  in  $\text{cm}^{-1}$ : 2955, 2921, 2853, 1696, 1606, 1526, 1470, 1393, 1214, 1177, 800 and 692;  $^1\text{H}$  NMR (200 MHz,  $\text{CDCl}_3$ ):  $\delta$  10.1 (s, 1H, CHO), 7.95 (d,  $J = 8.0$  Hz, 2H, Ar), 7.69 (d,  $J = 6.2$  Hz, 2H, Ar), 7.1-7.19 (m, 1H, Ar), 6.83 (t,  $J = 7.3$  Hz, 1H, Ar), 4.1 (t,  $J = 6.0$  Hz, 2H,  $1 \times \text{OCH}_2$ ), 1.93-0.86 (m, 15H,  $6 \times \text{CH}_2$ ,  $1 \times \text{CH}_3$ ); MS (FAB+):  $m/z$  for  $\text{C}_{21}\text{H}_{25}\text{O}_2\text{F}_2(\text{M}+1)$  Calculated: 347.2. Found: 347.2.

#### I.2.14. Synthesis of hydroxy chalcone 13

Compound **13** was prepared by a similar procedure as described for the preparation of chalcones (**2a-e**). Precursors and their quantities used: aldehyde (**12**) (1.7 g, 4.9 mmol, 1.0 equiv.), 3-hydroxy acetophenone (0.67 g, 4.9 mmol, 1equiv.), KOH (1 g, 17.7 mmol, 3.6 equiv.) and methanol (30 ml). Column chromatography: silica gel (60-120 mesh) and 10% EtOAc-hexanes as the eluent. A yellow solid;  $R_f = 0.3$  (70%  $\text{CH}_2\text{Cl}_2$ -EtOAc); yield: 1.82 g (80%); m.p.: 112 °C; IR (KBr Pellet)  $\nu_{\max}$  in  $\text{cm}^{-1}$ : 3424, 2922, 2853, 1658, 1575, 1505, 1470, 1232, 1184, 1106, 891, 740 and 674;  $^1\text{H}$  NMR (200 MHz,  $\text{CDCl}_3$ ):  $\delta$  7.85 (d,  $J = 15.7$  Hz, 1H,  $1 \times \text{olefinic H}$ ), 7.72 (d,  $J = 8.2$  Hz, 1H, Ar), 7.66 (d,  $J = 13.2$  Hz, 1H,  $1 \times \text{olefinic H}$ ), 7.5-7.59 (m, 5H, Ar) 7.4 (t, 1H,  $J = 7.8$  Hz, Ar), 7.1-7.18 (m, 2H, Ar), 6.82 (d,  $J = 7.3$  Hz, 1H, Ar), 5.2 (s, 1H,  $1 \times \text{OH}$ ), 4.1 (t,  $J = 6.4$  Hz, 2H,  $1 \times \text{OCH}_2$ ), 1.89-0.86 (m, 15H,  $6 \times \text{CH}_2$ ,  $1 \times \text{CH}_3$ ); MS (FAB+):  $m/z$  for  $\text{C}_{29}\text{H}_{30}\text{O}_3\text{F}_2$ , Calculated: 464.2, Found: 464.6.

#### I.2.15. Synthesis of dimers of Series-4 (3BFDC-n,m series)

These target dimers were synthesized and purified in an analogous way to that noted above for dimers of series-1 (see section **2.3B**). Precursors and their quantities used: cholesteryl  $\omega$ -bromoalkanoate (**1a-d**) (0.26 mmol, 1equiv.), hydroxy chalcone **13** (0.12 g, 0.26 mmol, 1equiv.), anhydrous  $\text{K}_2\text{CO}_3$  (0.072 g, 0.52 mmol, 4 equiv.) and dry DMF (5-6 ml).

**3BFDC-3,8:** A cream solid;  $R_f = 0.29$  (20% EtOAc-hexanes); yield: 0.182 g (76%); UV-Vis:  $\lambda_{\max} = 325.8$  nm,  $\epsilon = 1.8 \times 10^4$  L mol<sup>-1</sup>cm<sup>-1</sup>,  $\lambda_{\max} = 262.1$  nm,  $\epsilon = 1.9 \times 10^4$  L mol<sup>-1</sup>cm<sup>-1</sup>, IR (KBr Pellet)  $\nu_{\max}$  in cm<sup>-1</sup>: 2932, 2869, 2364, 1735, 1592, 1504, 1256, 1186, 896 and 799; <sup>1</sup>H NMR (400 MHz, CDCl<sub>3</sub>):  $\delta$  7.84 (d,  $J = 15.6$  Hz, 1H, 1× olefinic H), 7.72 (d,  $J = 8.4$  Hz, 2H, Ar) 7.49-7.61 (m, 5H, 1 × olefinic H, 4 × Ar), 7.41(t,  $J = 8.0$  Hz, 1H, Ar), 7.11-7.2 (m, 2H, Ar), 6.8-6.84 (m, 1H, Ar), 5.36 (bd,  $J = 4.2$  Hz, 1H, 1 × olefinic H), 4.61-4.63 (m, 1H, 1 × CHOCO), 4.06-4.1 (m, 4H, 2× OCH<sub>2</sub>), 2.51(t,  $J = 6.8$  Hz, 2H, 1× CH<sub>2</sub>), 2.32-0.67(m, 45H, 18 × CH<sub>2</sub>, 6 × CH, 1× CH<sub>3</sub>), 1.01 (s, 3H, 1 × CH<sub>3</sub>), 0.89 (d,  $J = 2.2$  Hz, 3H, 1 × CH<sub>3</sub>), 0.87 (d,  $J = 1.8$  Hz, 3H, 1× CH<sub>3</sub>), 0.85 (d,  $J = 1.8$  Hz, 3H, 1 × CH<sub>3</sub>), 0.66 (s, 3H, 1 × CH<sub>3</sub>); MS (FAB+): m/z for C<sub>60</sub>H<sub>80</sub>F<sub>2</sub>O<sub>5</sub>, Calculated: 918.6, Found: 918.6; Anal.calcd for C<sub>60</sub>H<sub>80</sub>F<sub>2</sub>O<sub>5</sub> (found) %:C 78.39 (78.3); H 8.77 (8.4).

**3BFDC-4,8:** A cream solid;  $R_f = 0.29$  (20% EtOAc-hexanes); yield: 0.189 g (78%); UV-Vis:  $\lambda_{\max} = 338$  nm,  $\epsilon = 1.6 \times 10^4$  L mol<sup>-1</sup>cm<sup>-1</sup>,  $\lambda_{\max} = 246$  nm,  $\epsilon = 1.3 \times 10^4$  L mol<sup>-1</sup>cm<sup>-1</sup>, IR (KBr Pellet)  $\nu_{\max}$  in cm<sup>-1</sup>: 2946, 2867, 2365, 1713, 1590, 1504, 1467, 1256, 1187, 1076, 952 and 794; <sup>1</sup>H NMR (400 MHz, CDCl<sub>3</sub>):  $\delta$  7.83 (d,  $J = 15.6$  Hz, 1H, 1×olefinic H), 7.72 (d,  $J = 8.3$  Hz, 2H, Ar) 7.54-7.58 (m, 5H, 1×olefinic H, 4 × Ar), 7.41(t,  $J = 6.4$  Hz, 1H, Ar), 7.1-7.14 (m, 2H, Ar), 6.8-6.84 (m, 1H, Ar), 5.37(bd,  $J = 4.4$  Hz, 1H, 1×olefinic H), 4.56-4.61(m, 1H, 1×CHOCO), 4.09 (t,  $J = 6.6$  Hz, 2H, 1 × OCH<sub>2</sub>), 4.04 (t,  $J = 6.6$  Hz, 2H, 1× OCH<sub>2</sub>), 2.42-0.67(m, 46H, 20 × CH<sub>2</sub>, 6 × CH), 1.01 (s, 3H, 1 × CH<sub>3</sub>), 0.91 (d,  $J = 6.5$  Hz, 3H, 1× CH<sub>3</sub>) 0.89 (d,  $J = 2.7$  Hz, 3H, 1× CH<sub>3</sub>), 0.87 (d,  $J = 1.8$  Hz, 3H, 1 × CH<sub>3</sub>), 0.85 (d,  $J = 1.7$  Hz, 3H, 1 × CH<sub>3</sub>), 0.67 (s, 3H, 1 × CH<sub>3</sub>); MS (FAB+): m/z for C<sub>61</sub>H<sub>83</sub>F<sub>2</sub>O<sub>5</sub>(M+1) Calculated: 933.6, Found: 933.6; Anal.calcd for C<sub>61</sub>H<sub>83</sub>F<sub>2</sub>O<sub>5</sub> (found) %:78.50(78.3); H 8.86(8.7).

**3BFDC-5,8:** A cream solid;  $R_f = 0.30$  (20% EtOAc-hexanes); yield: 0.184 g (75%); UV-Vis:  $\lambda_{\max} = 321$  nm,  $\epsilon = 1.5 \times 10^4$  L mol<sup>-1</sup>cm<sup>-1</sup>,  $\lambda_{\max} = 262$  nm,  $\epsilon = 1.8 \times 10^4$  L mol<sup>-1</sup>cm<sup>-1</sup>, IR (KBr Pellet)  $\nu_{\max}$  in cm<sup>-1</sup>: 2934, 2868, 2363, 1729, 1592, 1503, 1468,

1439, 1256, 1183, 1076 and 792;  $^1\text{H}$  NMR (400 MHz,  $\text{CDCl}_3$ ):  $\delta$  7.83 (d,  $J = 12.6$  Hz, 1H, 1 $\times$ olefinic H), 7.72 (d,  $J = 6.6$  Hz, 2H, Ar) 7.58-7.6 (m, 4H, Ar), 7.54 (d,  $J = 12.6$  Hz, 1 $\times$ olefinic H), 7.41(t,  $J = 6.4$  Hz, 1H, Ar), 7.1-7.14 (m, 2H, Ar), 6.8-6.84 (m, 1H, Ar), 5.37 (bd,  $J = 4.3$  Hz, 1H, 1  $\times$ olefinic H), 4.56-4.61(m, 1H, 1  $\times$  CHOCO), 4.09 (t,  $J = 5.2$  Hz, 2H, 1  $\times$  OCH<sub>2</sub>), 4.05 (t,  $J = 5.1$  Hz, 2H, 1  $\times$  OCH<sub>2</sub>), 2.35-0.67 (m, 51H, 21  $\times$  CH<sub>2</sub>, 6  $\times$  CH, 1 $\times$  CH<sub>3</sub>), 1.01 (s, 3H, 1  $\times$  CH<sub>3</sub>), 0.87 (d,  $J = 1.7$  Hz, 3H, 1 $\times$  CH<sub>3</sub>), 0.86 (d,  $J = 1.7$  Hz, 3H, 1  $\times$  CH<sub>3</sub>), 0.85 (d,  $J = 1.7$  Hz, 3H, 1  $\times$  CH<sub>3</sub>), 0.67 (s, 3H, 1  $\times$  CH<sub>3</sub>);  $^{13}\text{C}$  NMR (100 MHz,  $\text{CDCl}_3$ ):  $\delta$  190.08, 172.92, 159.37, 148.37, 144.05, 139.65, 137.09, 134.14, 129.51,129.14, 128.59, 123.39, 122.55, 122.33,121.95, 120.86, 119.60,113.69, 109.75,73.78, 69.97, 67.90, 56.66, 56.14, 50.02, 42.28, 39.70, 39.47, 38.12, 36.95, 36.55, 36.15, 35.72, 34.52, 31.84, 31.72, 29.21, 29.11, 28.84, 28.15, 27.94, 27.79, 25.81, 25.56, 24.72, 24.21, 23.79, 22.72, 22.56, 22.48, 20.98, 19.23, 18.65, 13.98, 11.78; MS (FAB+):  $m/z$  for  $\text{C}_{62}\text{H}_{85}\text{F}_2\text{O}_5(\text{M}+1)$  Calculated: 947.6, Found: 947.6; Anal.calcd for  $\text{C}_{62}\text{H}_{84}\text{F}_2\text{O}_5$  (found) %: C 78.61(78.6); H 8.94(8.7).

**3BFDC-7,8:** A cream solid;  $R_f = 0.38$  (20% EtOAc-hexanes); yield: 0.186 g (74%); UV-Vis:  $\lambda_{\text{max}} = 325.7$  nm,  $\epsilon = 1.7 \times 10^4 \text{ L mol}^{-1}\text{cm}^{-1}$ ,  $\lambda_{\text{max}} = 262$  nm,  $\epsilon = 1.9 \times 10^4 \text{ L mol}^{-1}\text{cm}^{-1}$ , IR (KBr Pellet)  $\nu_{\text{max}}$  in  $\text{cm}^{-1}$ : 2934, 2867, 1732, 1593, 1576, 1470, 1296, 1254, 1173, 1078 and 777;  $^1\text{H}$  NMR (400 MHz,  $\text{CDCl}_3$ ):  $\delta$  7.83 (d,  $J = 15.7$  Hz, 1H, 1 $\times$ olefinic H), 7.72 (d,  $J = 8.3$  Hz, 2H, Ar) 7.52-7.6 (m, 5H, 4  $\times$  Ar, 1 $\times$ olefinic H), 7.41(t,  $J = 8.0$  Hz, 1H, Ar), 7.1-7.12 (m, 2H, Ar), 6.8-6.83 (m, 1H, Ar), 5.35 (bd,  $J = 4.3$  Hz, 1H, 1  $\times$ olefinic H), 4.56-4.61(m, 1H, 1  $\times$  CHOCO), 4.08 (t,  $J = 6.6$  Hz, 2H, 1  $\times$  OCH<sub>2</sub>), 4.03 (t,  $J = 6.4$  Hz, 2H, 1 $\times$  OCH<sub>2</sub>), 2.32-0.67(m, 55H, 23  $\times$  CH<sub>2</sub>, 6  $\times$  CH, 1  $\times$  CH<sub>3</sub>), 1.01 (s, 3H, 1  $\times$  CH<sub>3</sub>), 0.92 (d,  $J = 6.5$  Hz, 3H, 1  $\times$  CH<sub>3</sub>), 0.89 (d,  $J = 2.7$  Hz, 3H, 1  $\times$  CH<sub>3</sub>), 0.86 (d,  $J = 1.7$  Hz, 3H, 1  $\times$  CH<sub>3</sub>), 0.66 (s, 3H, 1  $\times$  CH<sub>3</sub>); MS (FAB+):  $m/z$  for  $\text{C}_{64}\text{H}_{89}\text{F}_2\text{O}_5(\text{M}+1)$  Calculated: 975.7. Found: 975.1; Anal.calcd for  $\text{C}_{64}\text{H}_{88}\text{F}_2\text{O}_5$  (found) %: C 78.81(78.5); H 9.09(9.4).

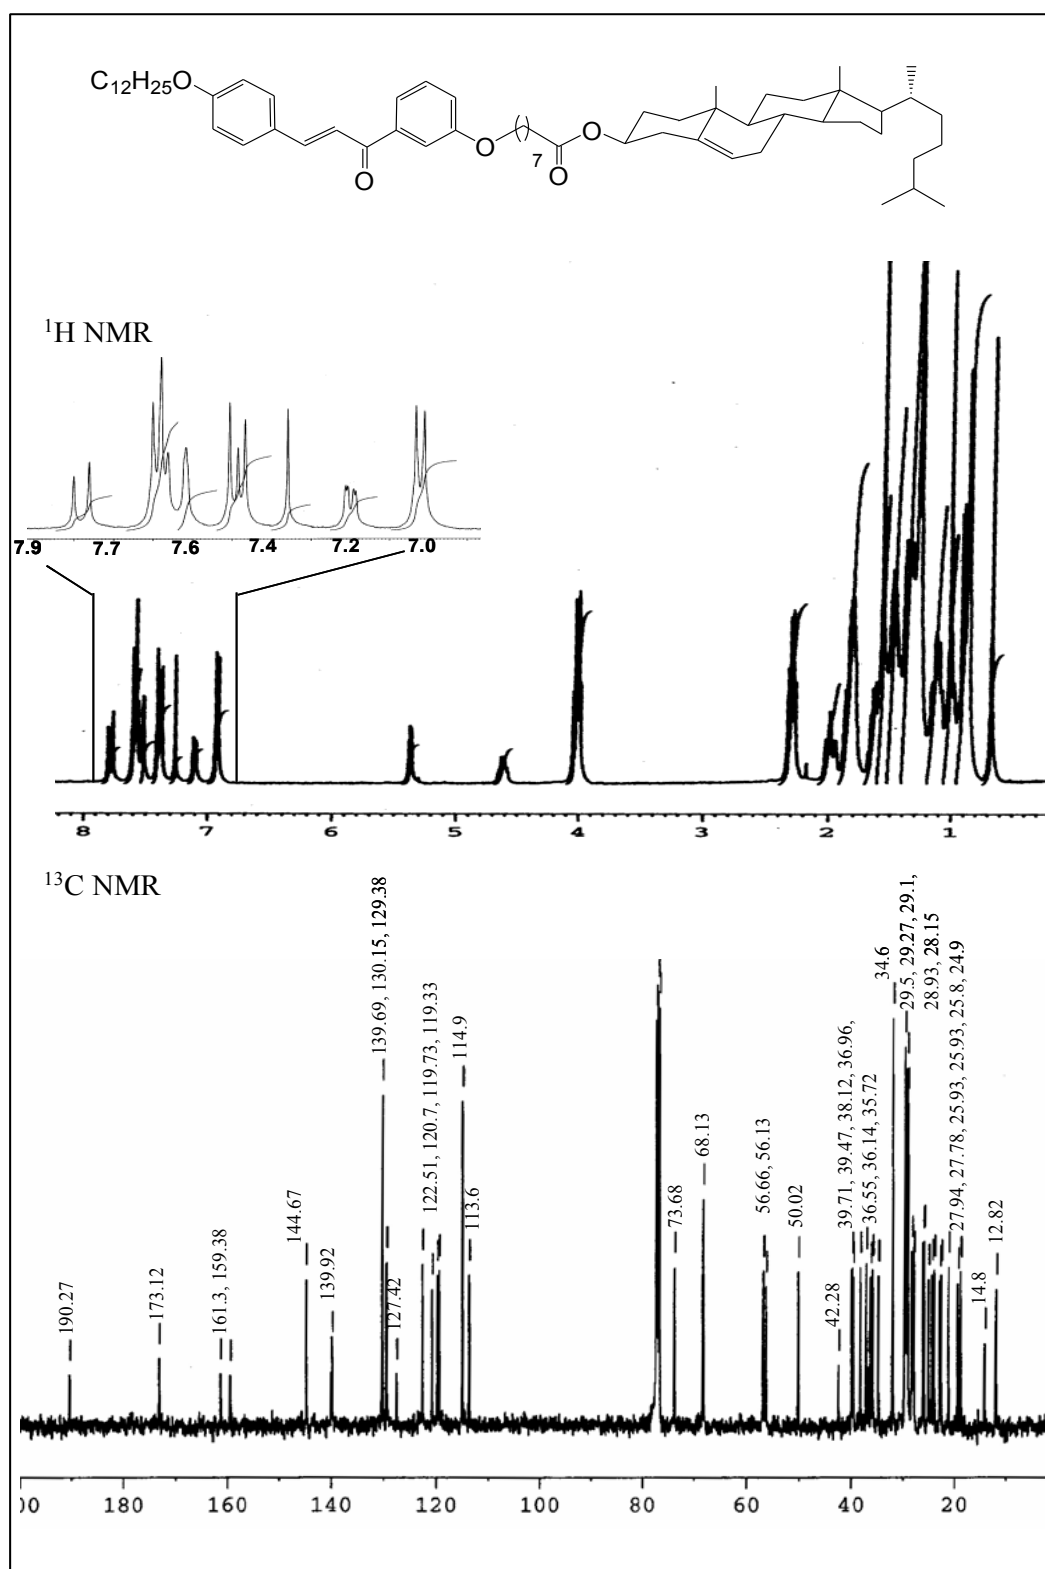

Figure S1. <sup>1</sup>H NMR (400 MHz) and <sup>13</sup>C NMR (100 MHz) spectra of **3DC-7,12** in CDCl<sub>3</sub>

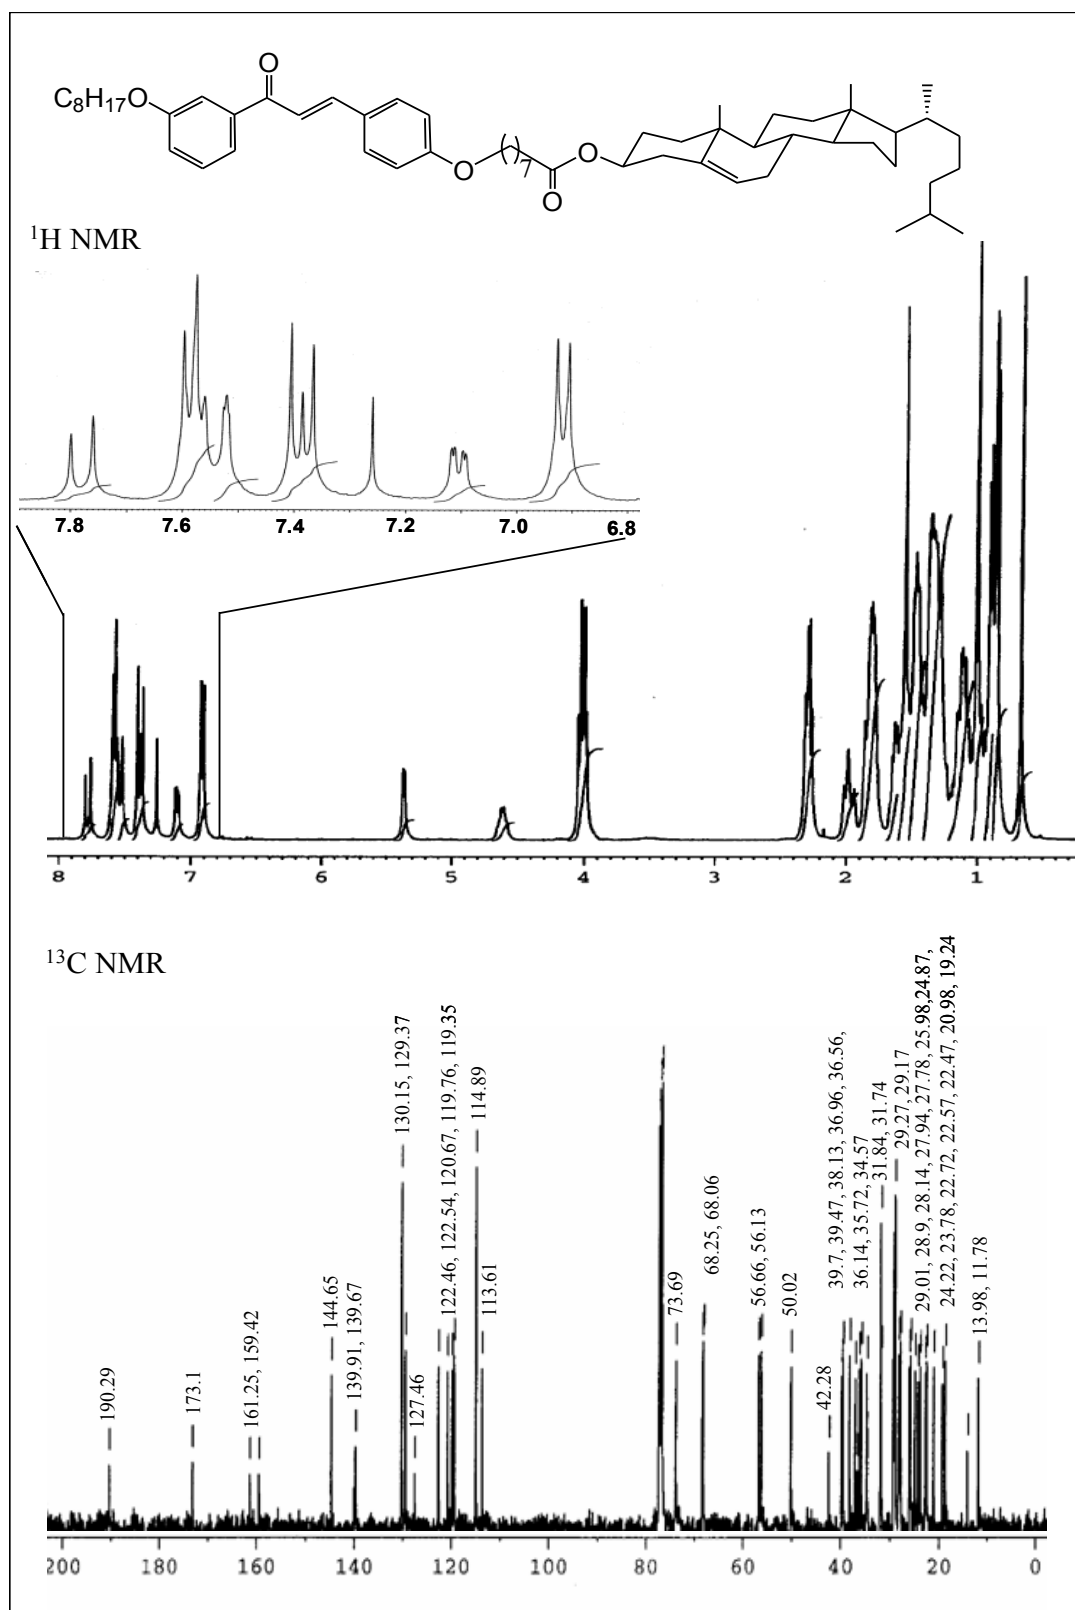

Figure S2. <sup>1</sup>H NMR (400 MHz) and <sup>13</sup>C NMR (100 MHz) spectra of **3RDC-7,8** in CDCl<sub>3</sub>

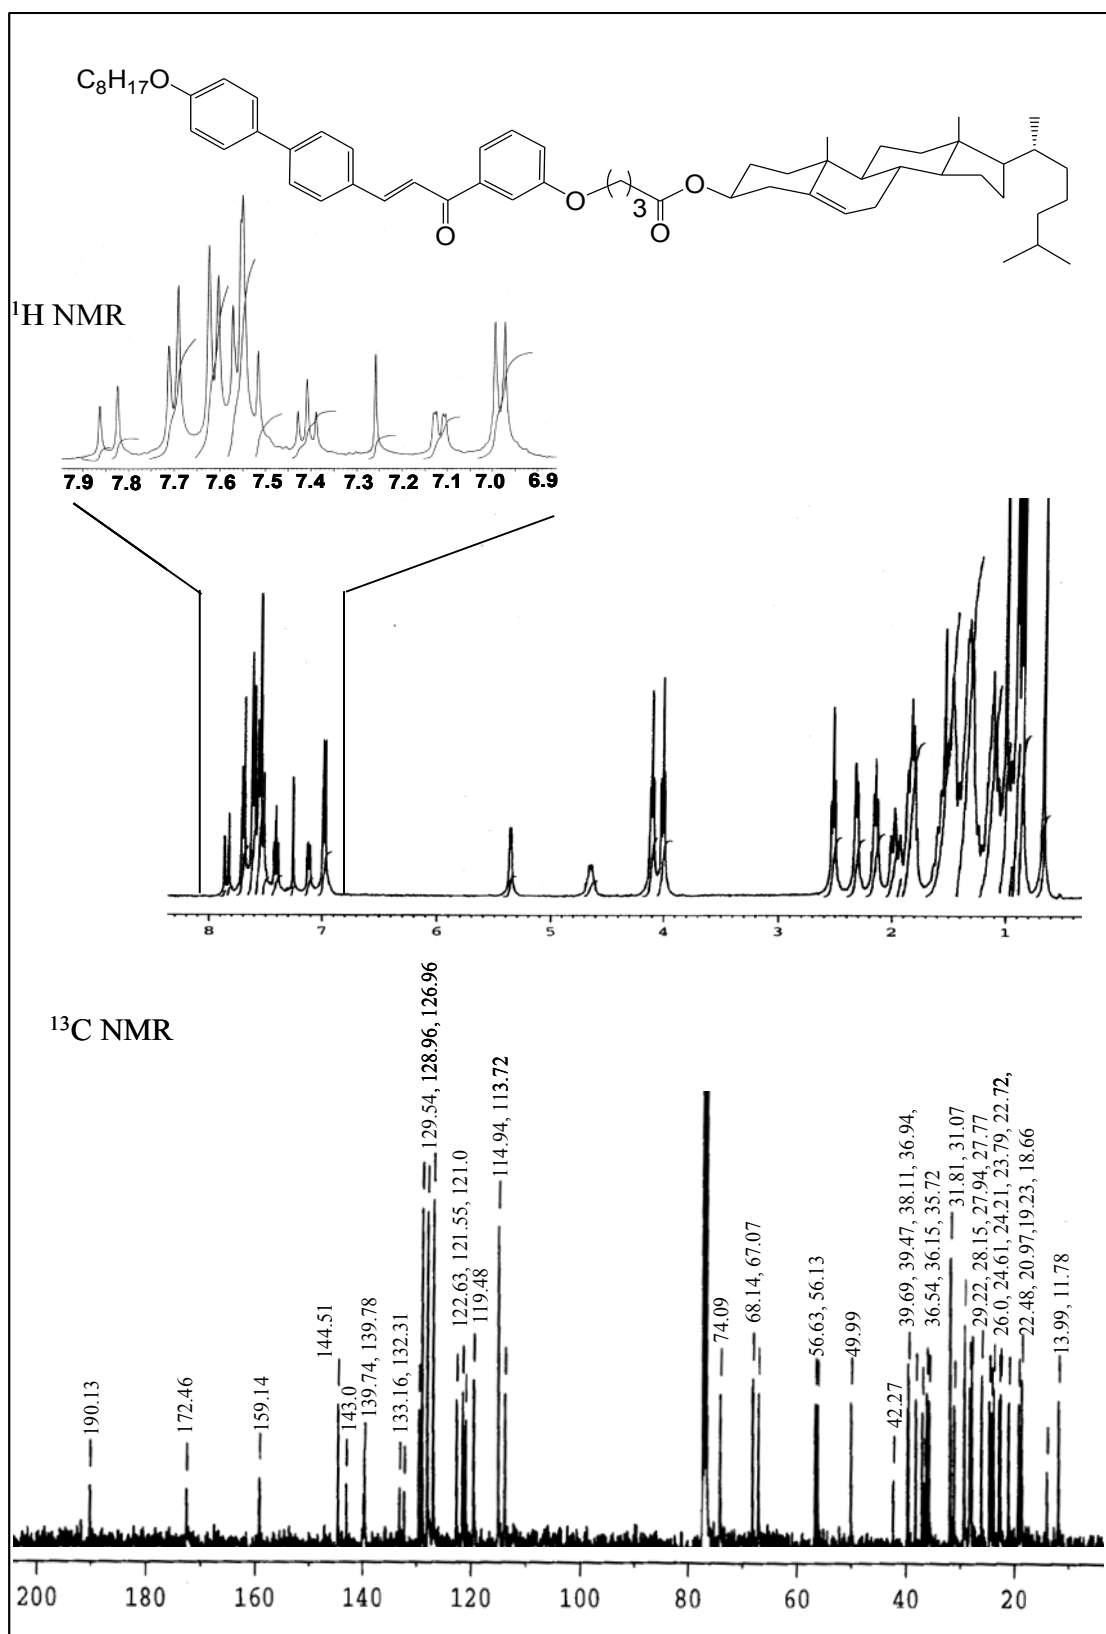

**Figure S3.** <sup>1</sup>H NMR (400 MHz) and <sup>13</sup>C NMR (100 MHz) spectra of **3BDC-3,8** in CDCl<sub>3</sub>

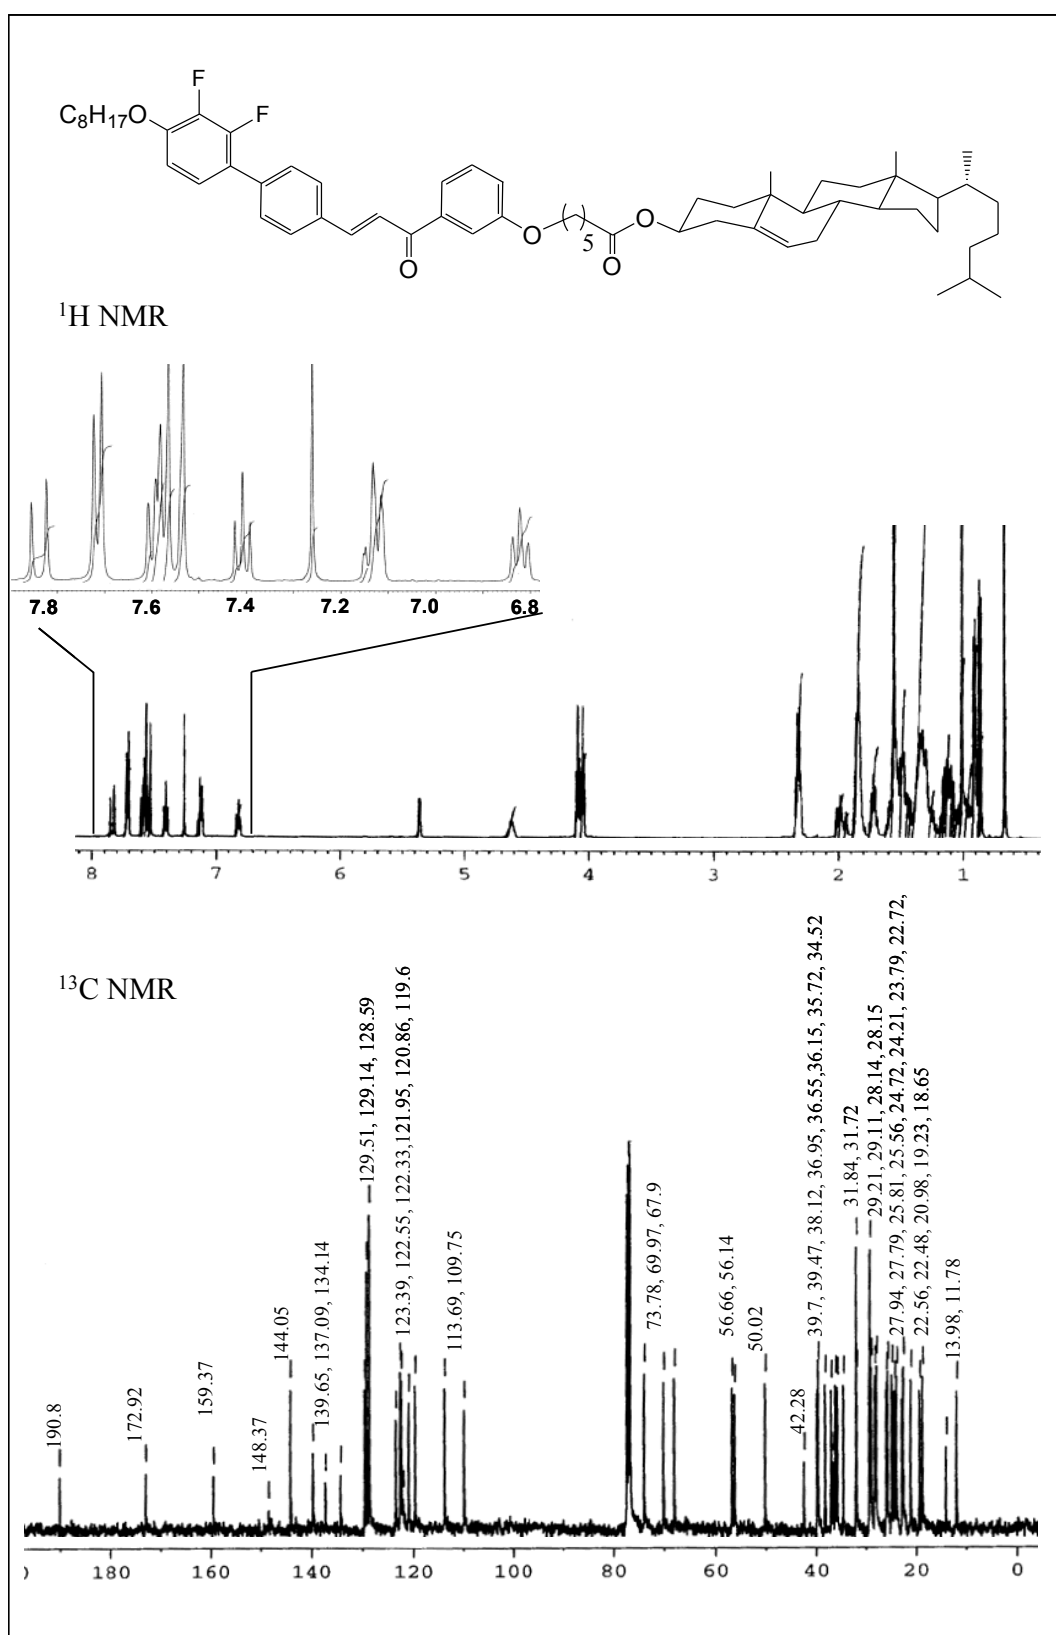

Figure S4. <sup>1</sup>H NMR (400 MHz) and <sup>13</sup>C NMR (100 MHz) spectra of **3FDC-5,8** in CDCl<sub>3</sub>



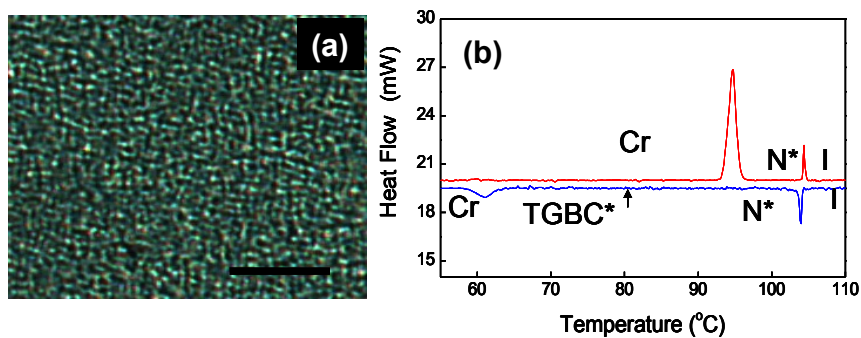

**Figure S5.** (a) Photomicrograph of square grid texture of TGBC\* obtained (at 65 °C) on cooling the N\* phase of **3DC-7,12** and (b) DSC traces of the first heating (red trace) and cooling (blue trace) cycles obtained for **3DC-7,12** at a rate of 5 °C min<sup>-1</sup>. (Bar: 100 μm).

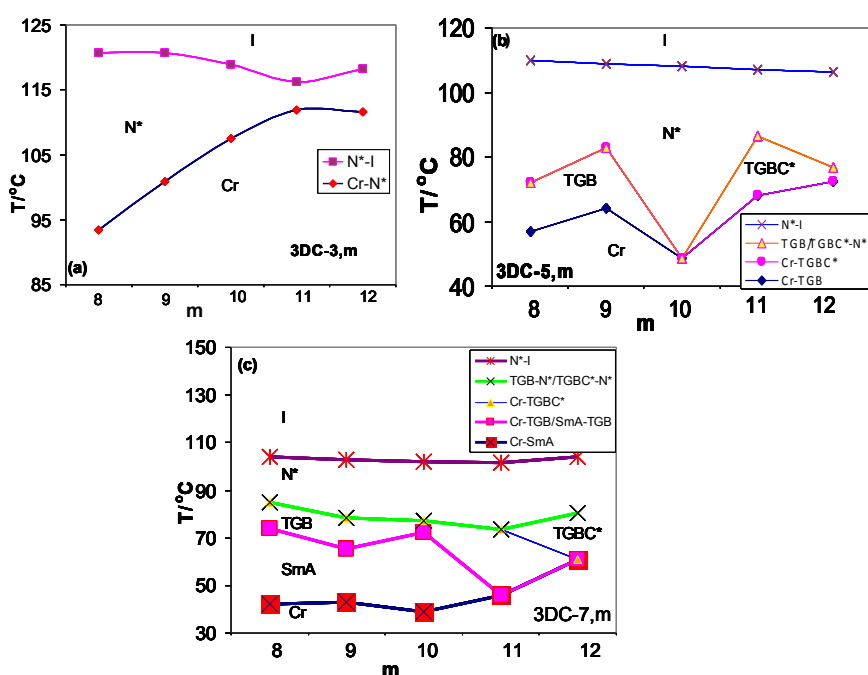

**Figure S6.** Plots of transition temperatures as a function of alkoxy tail length (**m**) for the compounds (a) **3DC-3,m** series, (b) **3DC-5,m** series and (c) **3DC-7,m** series.

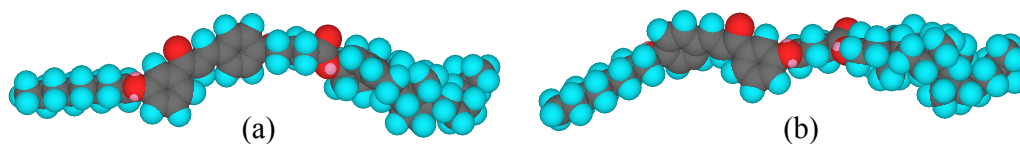

**Figure S7.** Energy minimized structures of dimers (a) **3RDC-3,8** and (b) **3DC-3,8**. Note that the former dimer is relatively linear when compared to the latter one.

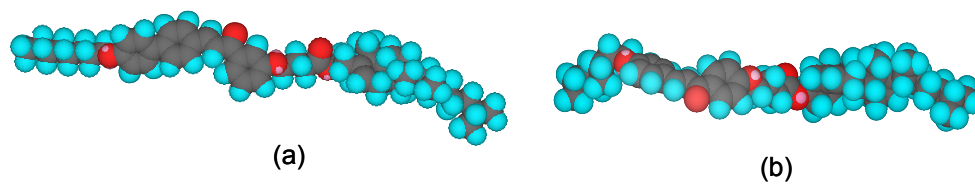

**Figure S8.** Energy minimized structures of dimers (a) **3BDC-3,8** and (b) **3DC-3,8**; Notice that the former dimer is little longer than the latter.

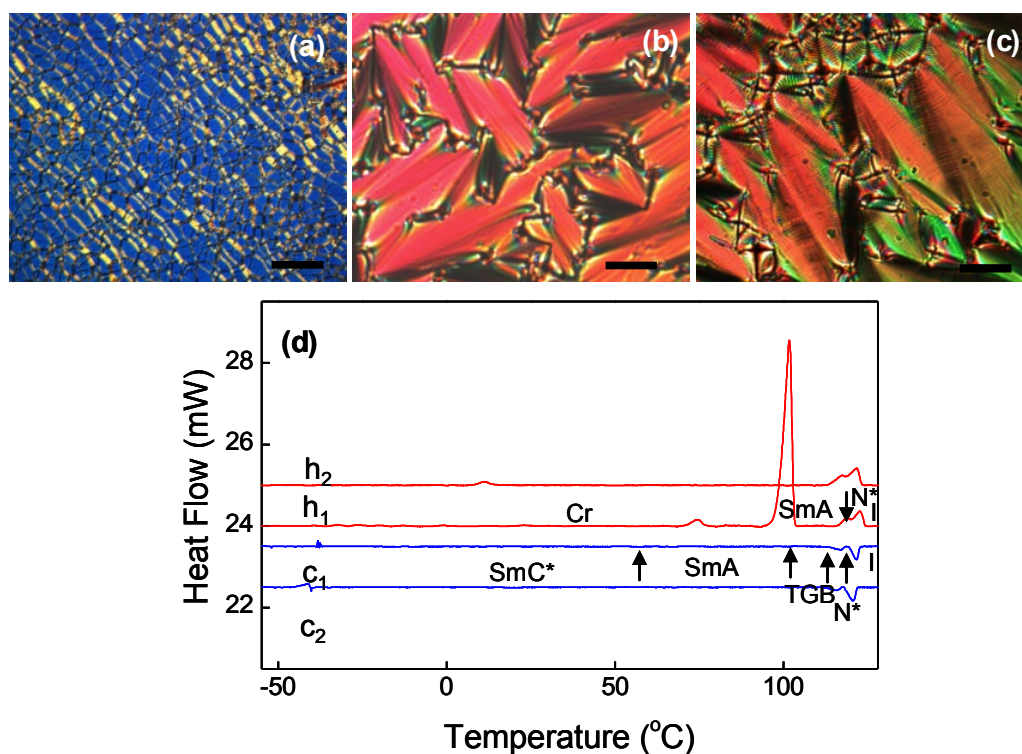

**Figure S9.** Photomicrographs of the textures observed for the mesophases of dimer **3RDC-5,8**: (a) oily streak (planar) texture of N\* phase (at 118 °C), (b) focal conic texture of SmA phase (at 80.7 °C) obtained on cooling from N\* (c) focal conics with chiral lines (at 50 °C) obtained for SmC\* phase on cooling from SmA phase (Bar: 100 μm). (d) DSC traces of first and second heating and cooling cycles obtained for **3RDC-5,8** at a rate of 5 °C min<sup>-1</sup> [h<sub>1</sub> = first heating (red trace), h<sub>2</sub> second heating, c<sub>1</sub> = first cooling (blue trace), c<sub>2</sub> = second cooling]

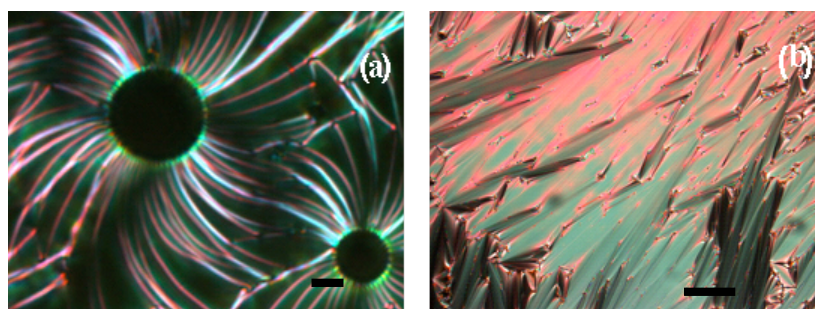

**Figure S10.** Photomicrographs of the filamentary texture of TGB phase growing around the air packets of homeotropic SmA phase (at 145 °C) (a) and focal-conic texture of the homogeneously aligned SmA phase at 110 °C (b) of dimer **3BDC-3,8**. (Bar: 100  $\mu\text{m}$ ).

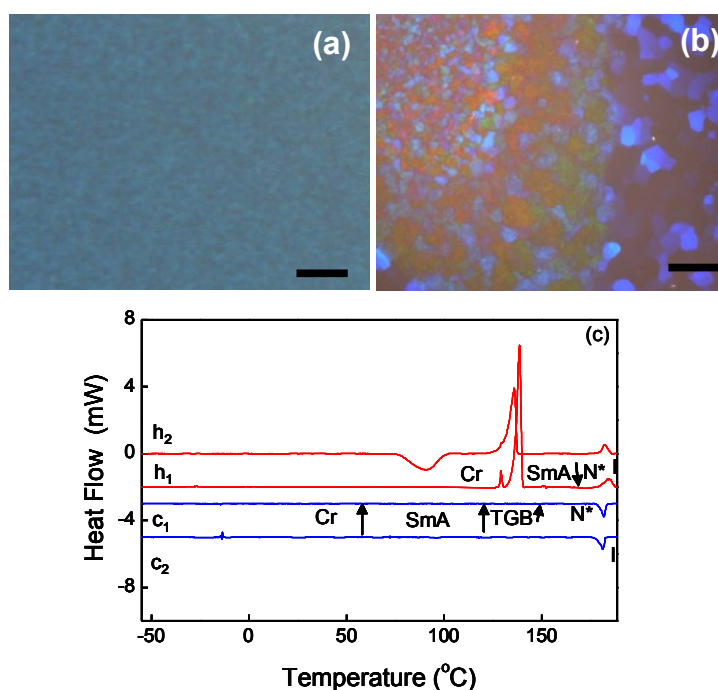

**Figure S11.** Photomicrographs of foggy texture of BPIII obtained at 153 °C (a), platelet texture of cubic blue phase (either BPI or BPII) obtained at 152 °C (b) for dimer **3BDC-4,8** and DSC traces of first and second heating (red trace) and cooling cycles obtained for **3BDC-5,8** (c). (Bar: 100  $\mu\text{m}$ ).

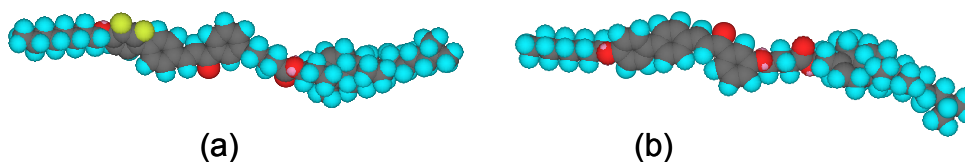

**Figure S12.** Energy minimized structures of dimers (a) **3FDC-3,8** and (b) **3BDC-3,8** showing the effect of lateral fluoro substitution on the molecular conformation.

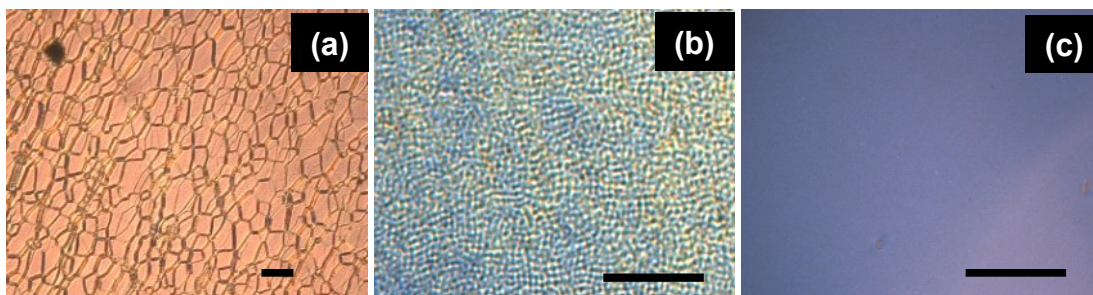

**Figure S13.** Photomicrographs of optical textures obtained for the (a) oily streak texture of N\* phase at 158.3 °C of dimer **3FDC-3,8**, (b) square grid pattern of TGBC\* phase at 107 °C of dimer **3FDC-3,8** and (c) foggy texture of BPIII at 136 °C of dimer **3FDC-4,8**. (Bar: 100  $\mu$ m).

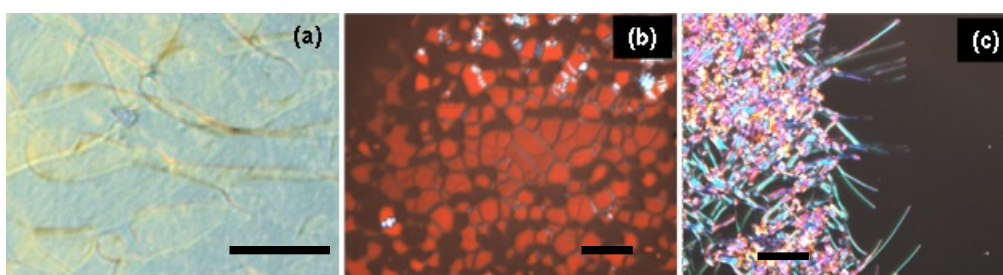

**Figure S14.** Photomicrographs of the planar texture obtained for the TGB of dimer **3FDC-5,8** at 120 °C (a), the platelet texture of BPI/II of dimer **3FDC-7,8** at 146 °C (b), and the texture corresponding to SmA (right portion; dark field of view), TGB (middle portion: filaments) and N\* (left portion: non-specific, but on shear gives planar texture) appearing simultaneously on heating from the homeotropic SmA phase of dimer **3FDC-7,8** (c). (Bar: 100  $\mu$ m).

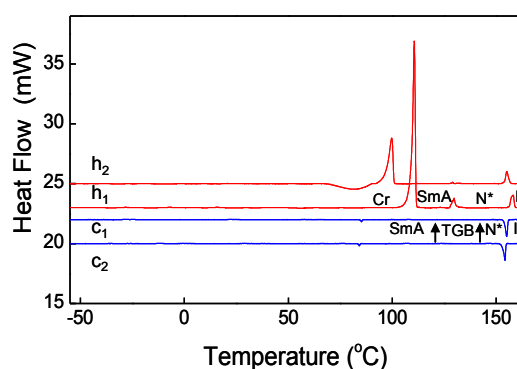

**Figure S15.** DSC thermograms of dimer **3FDC-5,8**.
